# Supplementary material
Source: PubMed Central journal article supplement (PMC4732916)
Supplement: NIHMS749290-supplement-Supplemental.pdf [file NIHMS749290-supplement-Supplemental.pdf]

# SUPPORTING INFORMATION

## Small molecule inhibitors of Ca<sup>2+</sup>-S100B reveal two protein conformations

Michael C. Cavalier<sup>†</sup>, Mohd. Imran Ansari<sup>#</sup>, Adam D. Pierce<sup>†</sup>, Paul T. Wilder<sup>†§</sup>, Laura E. McKnight<sup>†</sup>, E. Prabhu Raman<sup>#</sup>, David B. Neau<sup>‡</sup>, Padmavani Bezawada<sup>#</sup>, Milad J. Alasady<sup>†</sup>, Thomas H. Charpentier<sup>†</sup>, Kristen M. Varney<sup>†</sup>, Eric A. Toth<sup>†§¥</sup>, Alexander D. MacKerell, Jr.<sup>#§</sup>, Andrew Coop<sup>#§</sup>, and David J. Weber<sup>†§\*</sup>

<sup>†</sup> Center for Biomolecular Therapeutics (CBT), Department of Biochemistry and Molecular Biology, University of Maryland School of Medicine, Baltimore, Maryland 21201, United States.

<sup>§</sup>Marlene and Stewart Greenebaum Cancer Center, University of Maryland School of Medicine, Baltimore, Maryland 21201, United States.

<sup>#</sup>Computer Aided Drug Design Center, University of Maryland, School of Pharmacy, Baltimore, Maryland 21201, United States.

<sup>¥</sup>Institute for Bioscience and Biotechnology Research, 9600 Gudelsky Drive Rockville, MD 20850, USA

<sup>‡</sup>NE-CAT, Cornell University, Argonne IL 60439, USA.

**Funding Source:** This work was supported by grants from the NIH (GM58888 and CA107331) to D.J.W. The training of M.C.C. is supported by a NIH T32 grant (CA154274).

\*To whom correspondence should be addressed; D.J.W., University of Maryland School of Medicine, Department of Biochemistry and Molecular Biology, Biomedical Research Facility Rm. 439, 108 N. Greene St., Baltimore, MD 21201. Phone (410) 706-4354, Fax (410) 706-0438, E-mail: dweber@som.umaryland.edu.

### Table of Contents

|                |              |
|----------------|--------------|
| Table S1       | Page S2      |
| Figure S1      | Page S3      |
| Figures S2-5   | Pages S4-7   |
| Figure S6      | Page S8      |
| Figure S7-29   | Page S9-31   |
| Figures S30-48 | Pages S32-50 |
| Table S2       | Page 51      |

| <b>Table S1. Calculated RMSD (Å) of Models from C<sup>α</sup> of <u>1MHO</u></b> |               |               |
|----------------------------------------------------------------------------------|---------------|---------------|
| <sup>Ca</sup> S100B• <b>5a</b>                                                   | 0.830 (0.307) |               |
| <sup>Ca</sup> S100B• <b>6b</b>                                                   | 0.829 (0.328) |               |
| <sup>Ca</sup> S100B• <b>17</b>                                                   | 0.215 (0.215) | 0.360 (0.235) |

The protein chains of the introduced models were aligned with the protein chain within 1MHO<sup>46</sup>. Numbers in parentheses are the calculated RMSD of only the globally conserved residues 1-84.

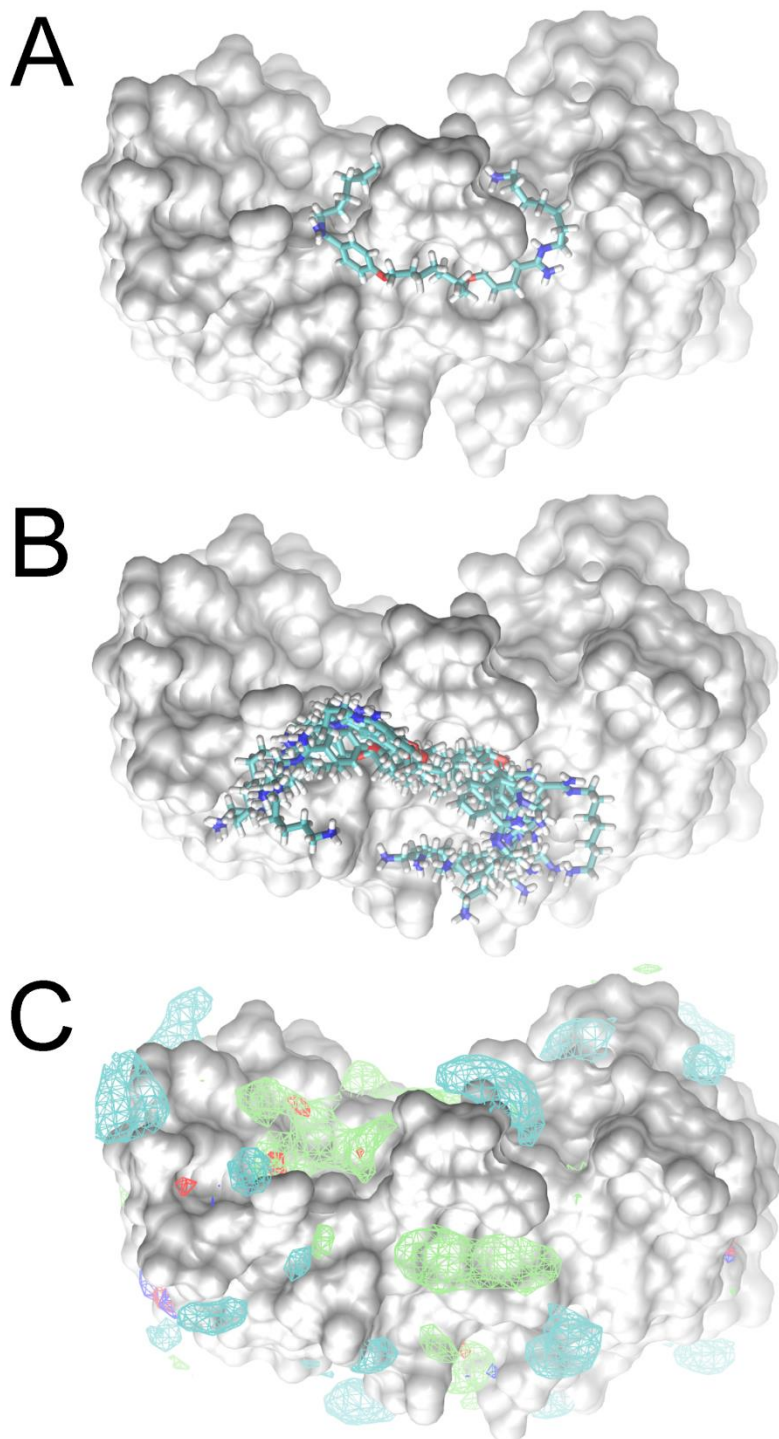

**Figure S1. The crystal structure of S100B overlaid with compound 9a.** (A) Top scoring conformation predicted by AutoDock, (B) Representative conformations calculated by MC-SILCS, (C) SILCS FragMaps are shown at a cutoff of -1.2 kcal/mol. Nonpolar maps are shown in green and positively charged group maps in cyan. The positively charged group maps drive the placement of the basic alkyl groups in the MC-SILCS docking.

**Figures S2-5. Assigned 2D  $^1\text{H}$ - $^{15}\text{N}$  HSQC NMR Spectra.** The binding of inhibitors to  $\text{CaS100B}$  was assessed by monitoring perturbations of backbone  $^1\text{H}$ - $^{15}\text{N}$  HSQC NMR experiments.

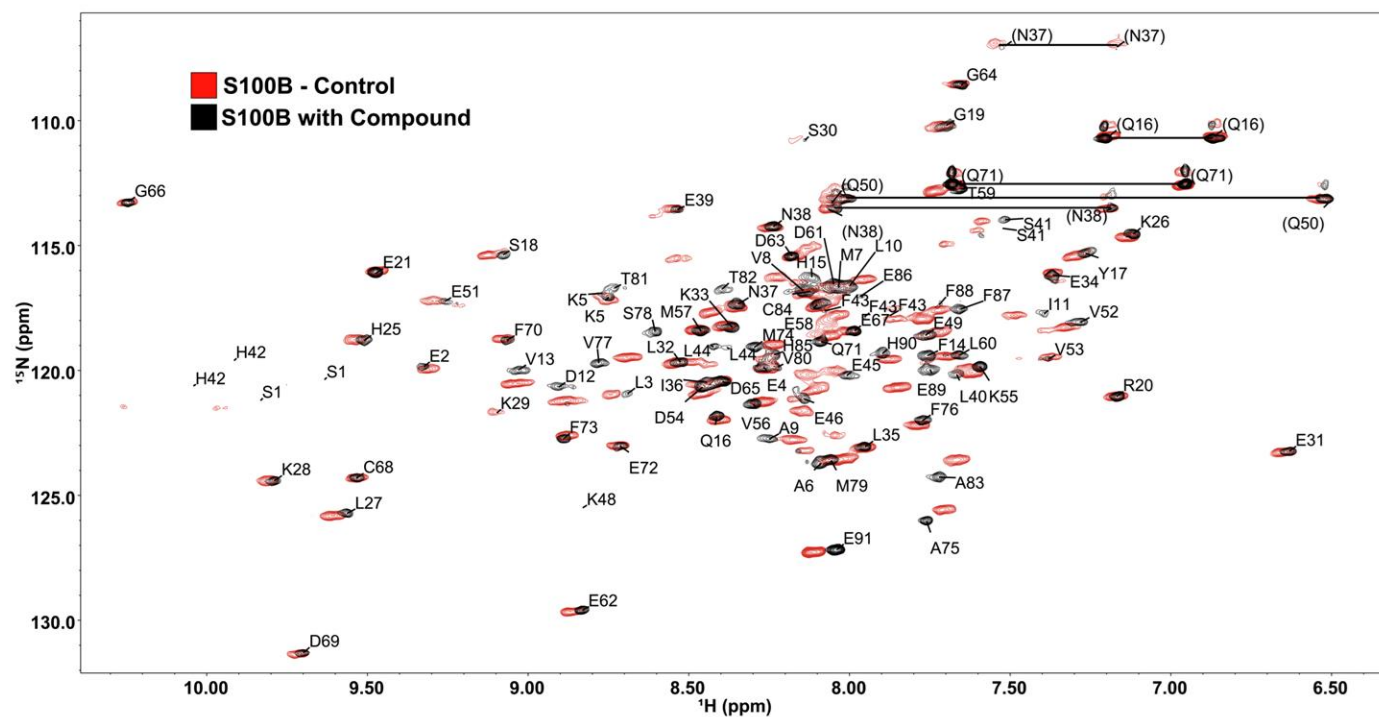

**6a HSQC Overlay**

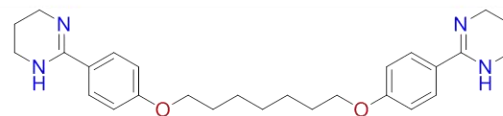

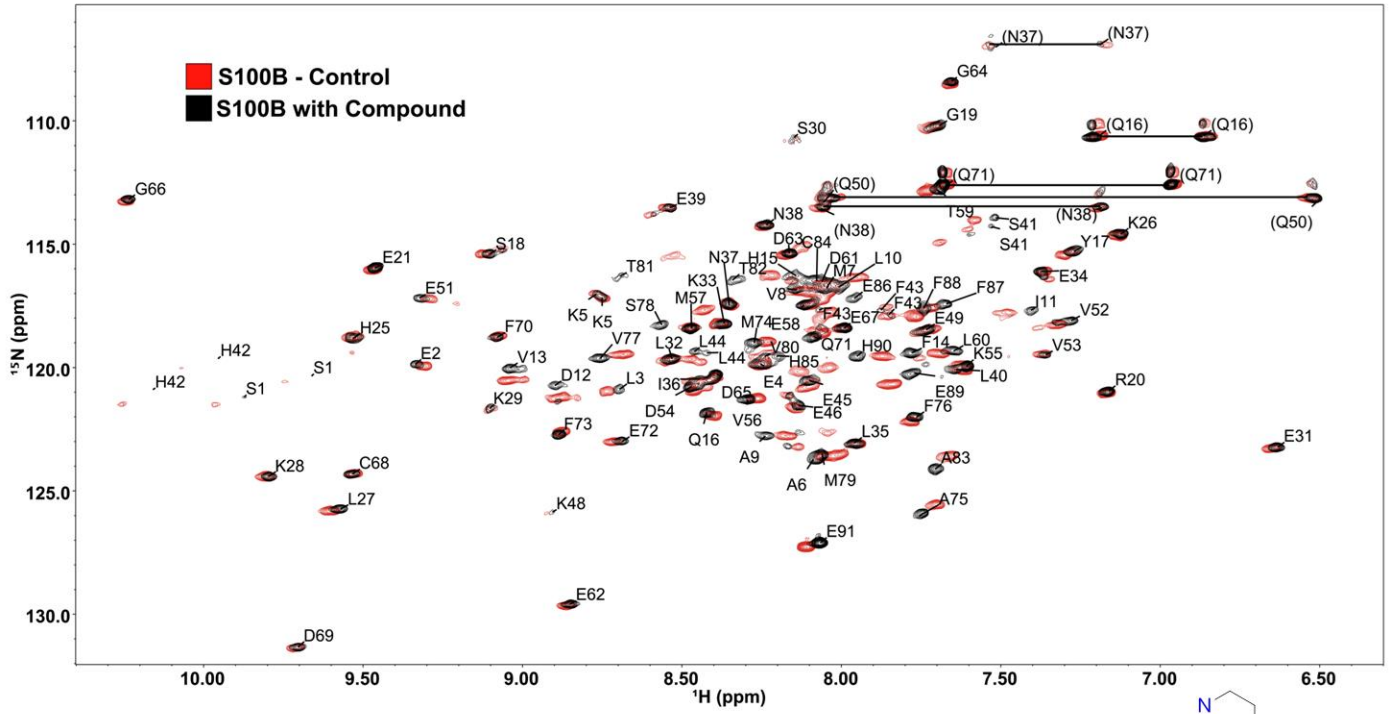

6c HSQC Overlay

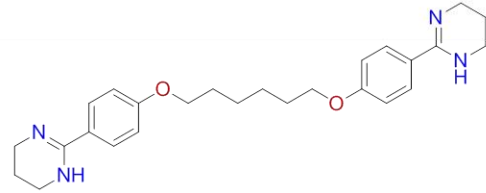

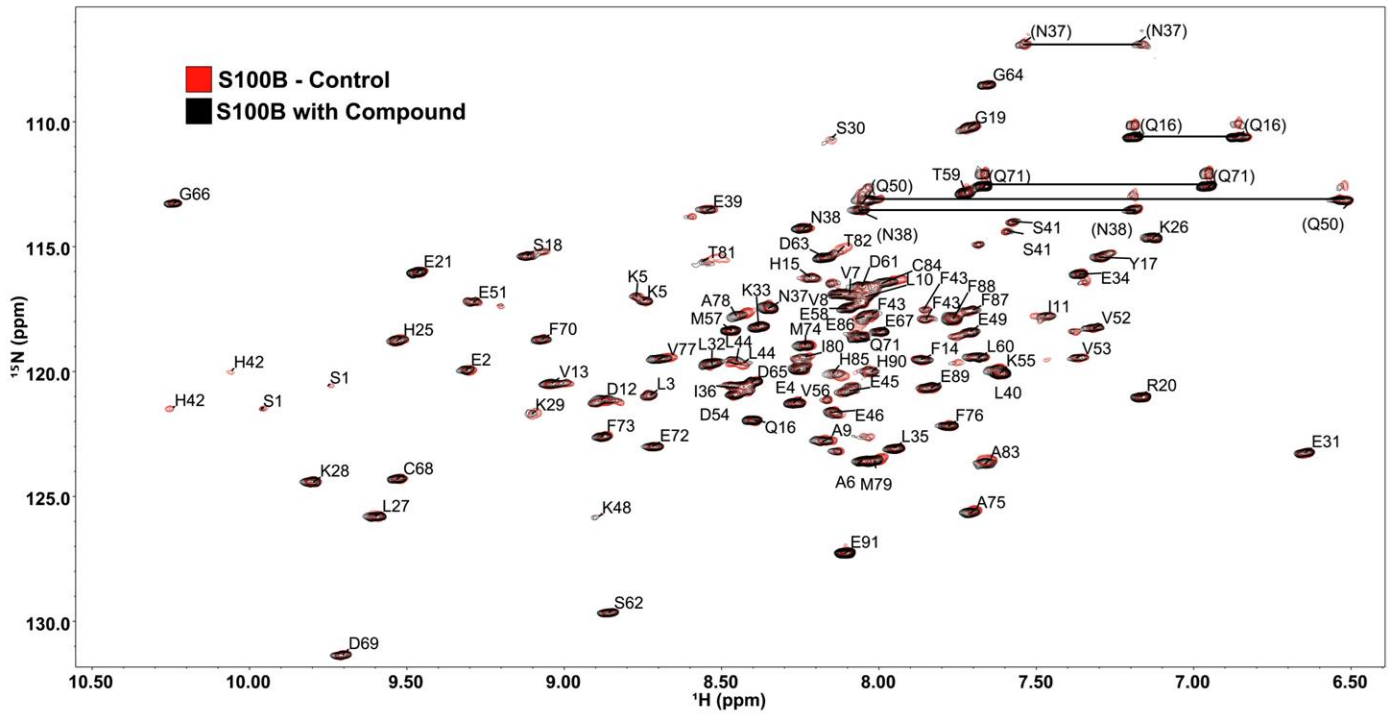

11 HSQC Overlay

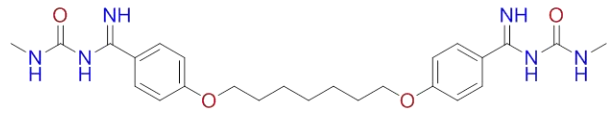

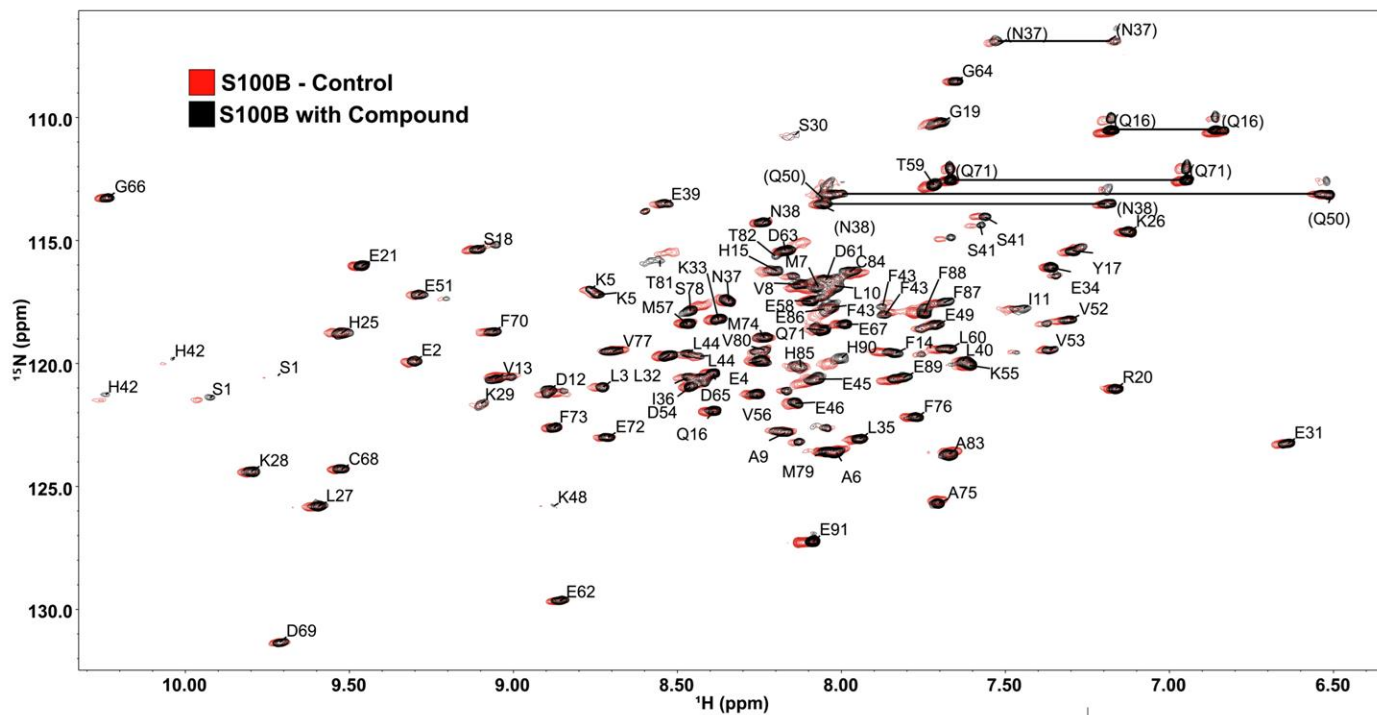

16b HSQC Overlay

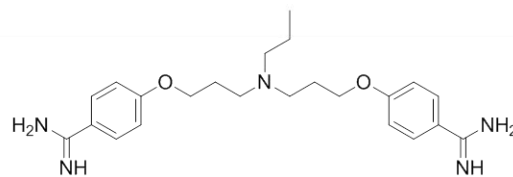

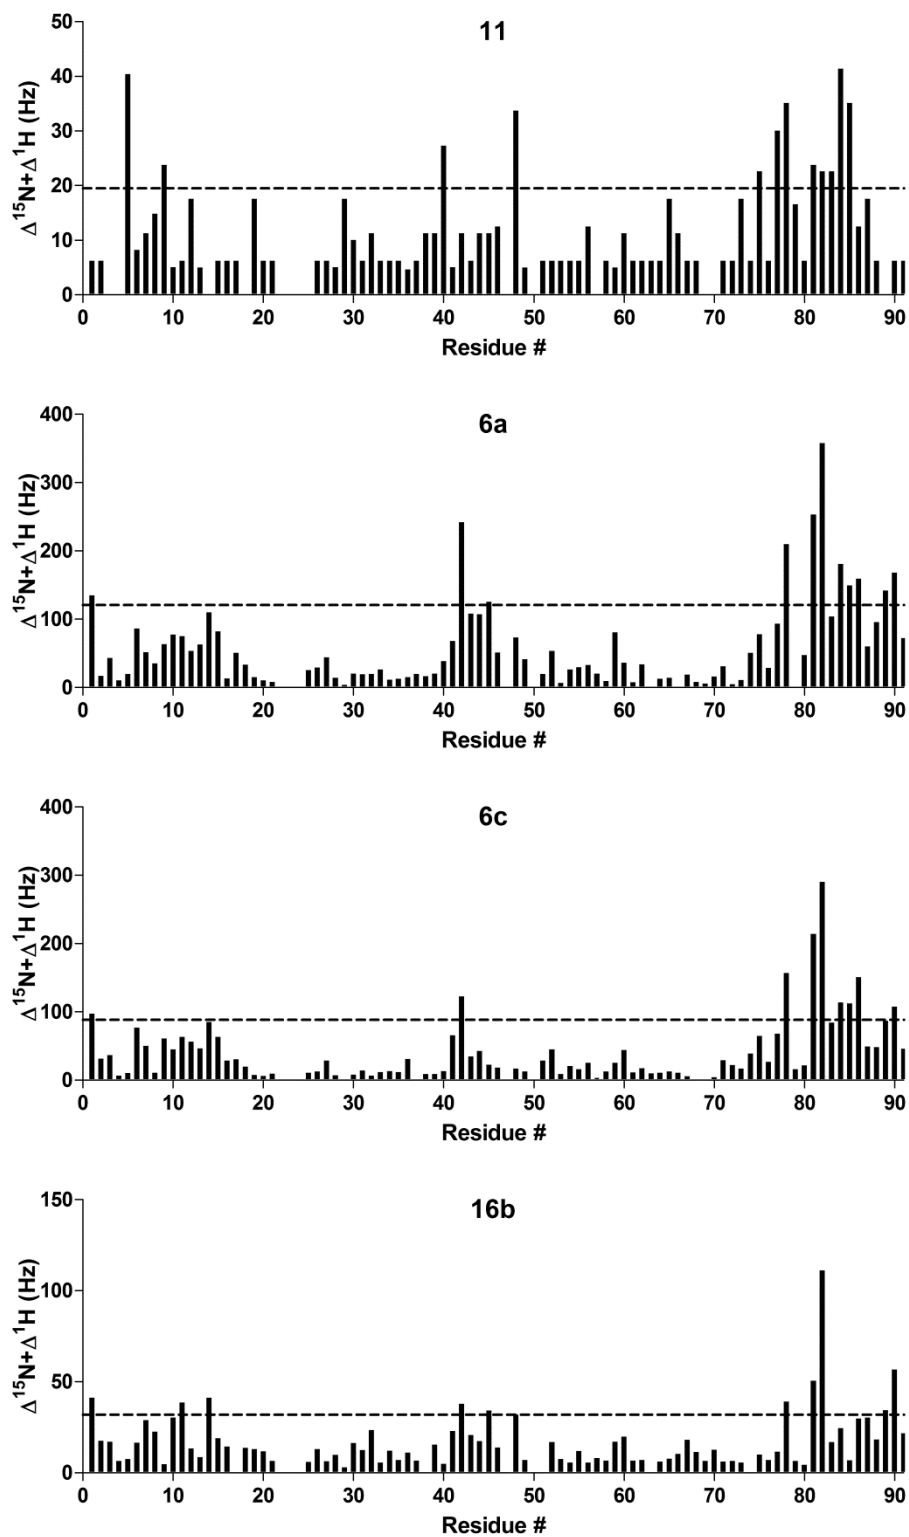

**Figure S6. Measurements of Chemical Shift Perturbations from Assigned 2D  $^1\text{H}$ - $^{15}\text{N}$  HSQC NMR spectra.** The solid horizontal line is plotted at the mean perturbation (Hz) plus one standard deviation for each dataset.



**Figures S7-29. HPLC-MS.** Purity of all compounds was determined to be >95% by HPLC.

Compound 16a

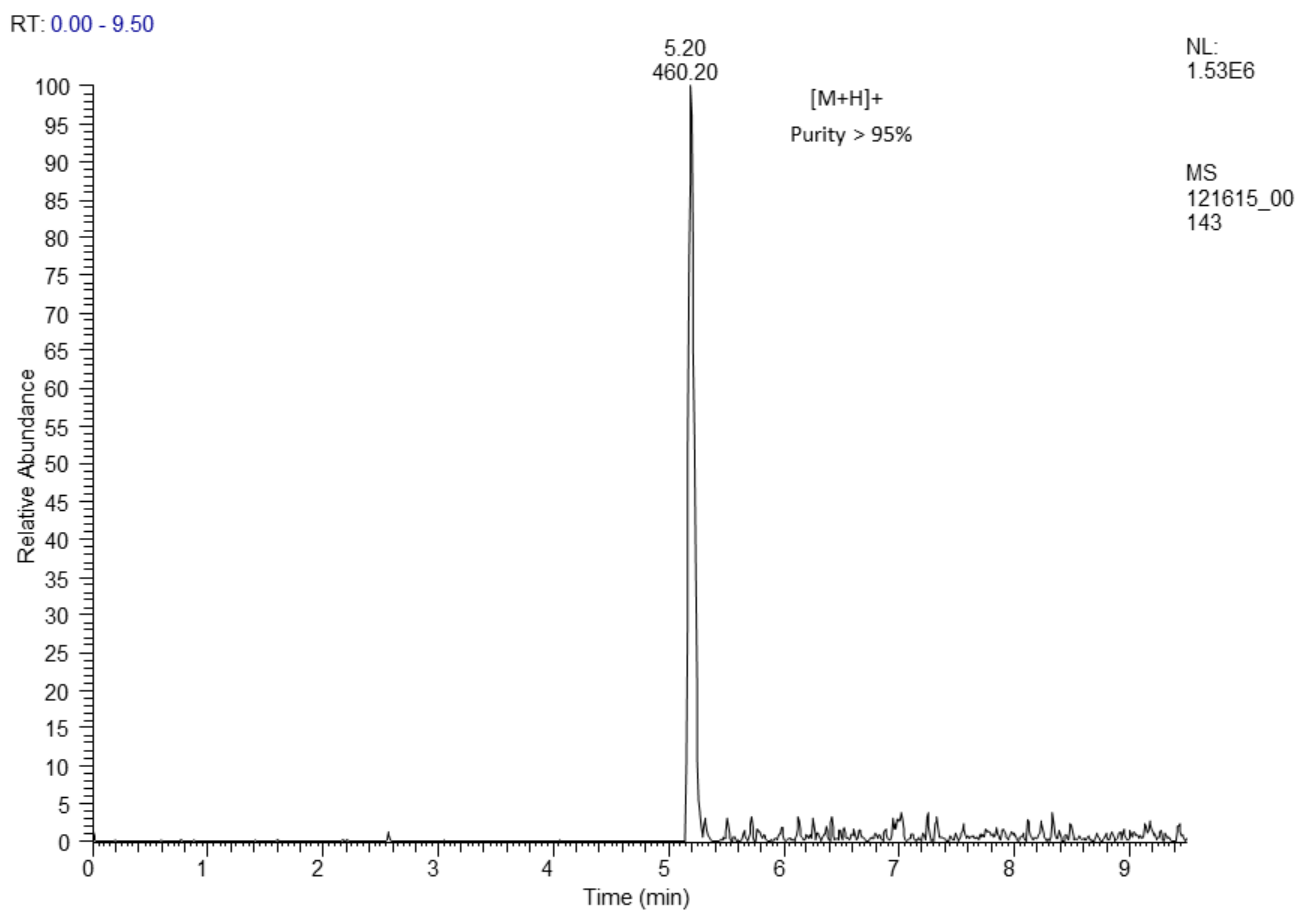

# Compound 11

RT: 0.00 - 9.50

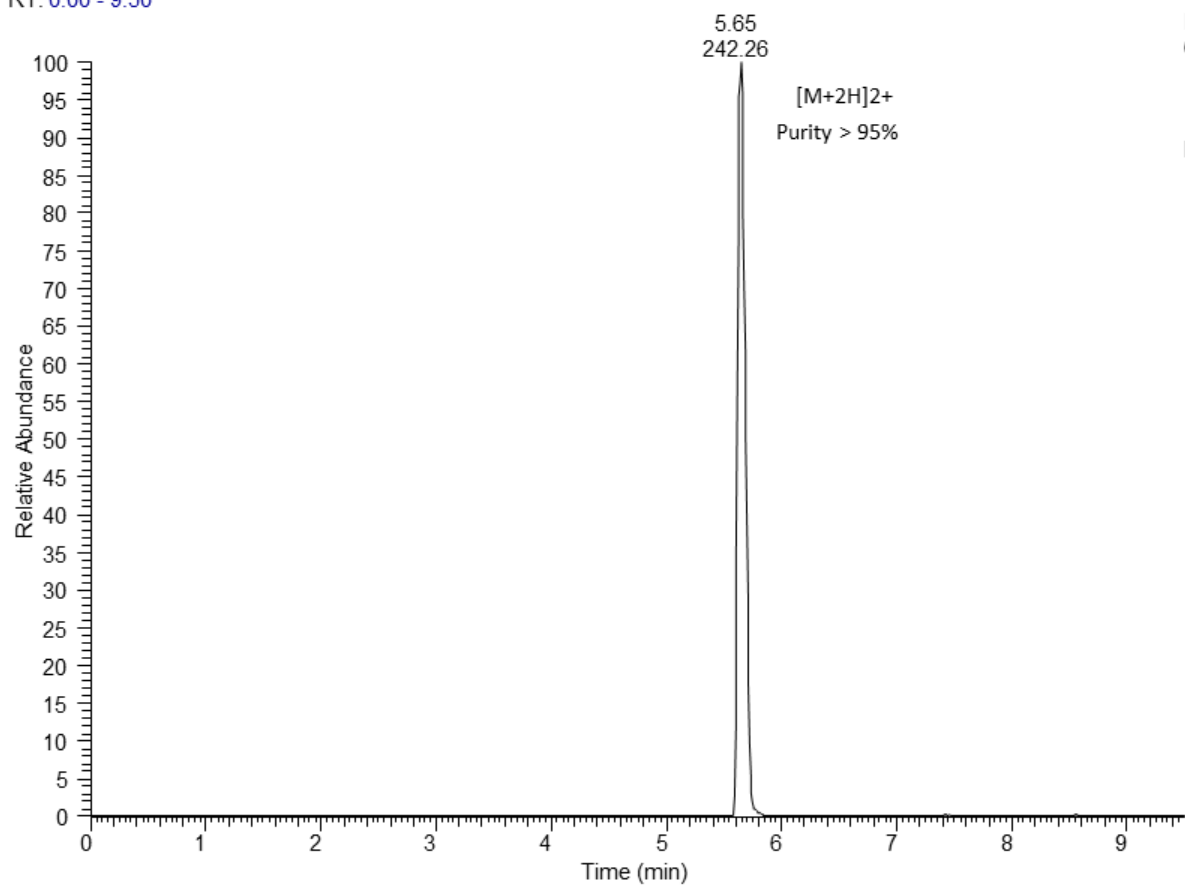

NL:  
6.25E7

MS  
121615\_00  
139

# Compound 10

RT: 0.00 - 8.00

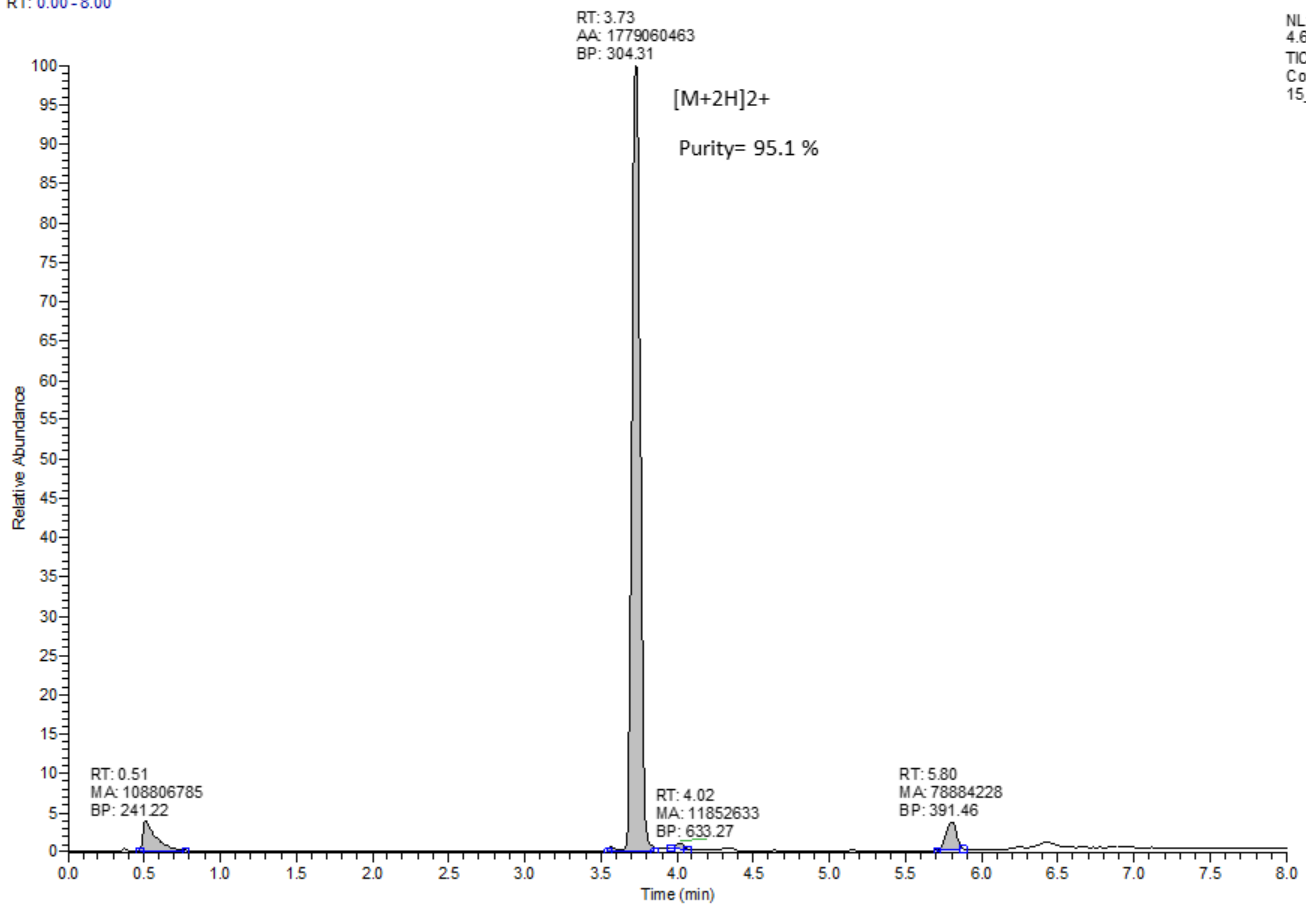

Compound 9b

RT: 0.00 - 9.50

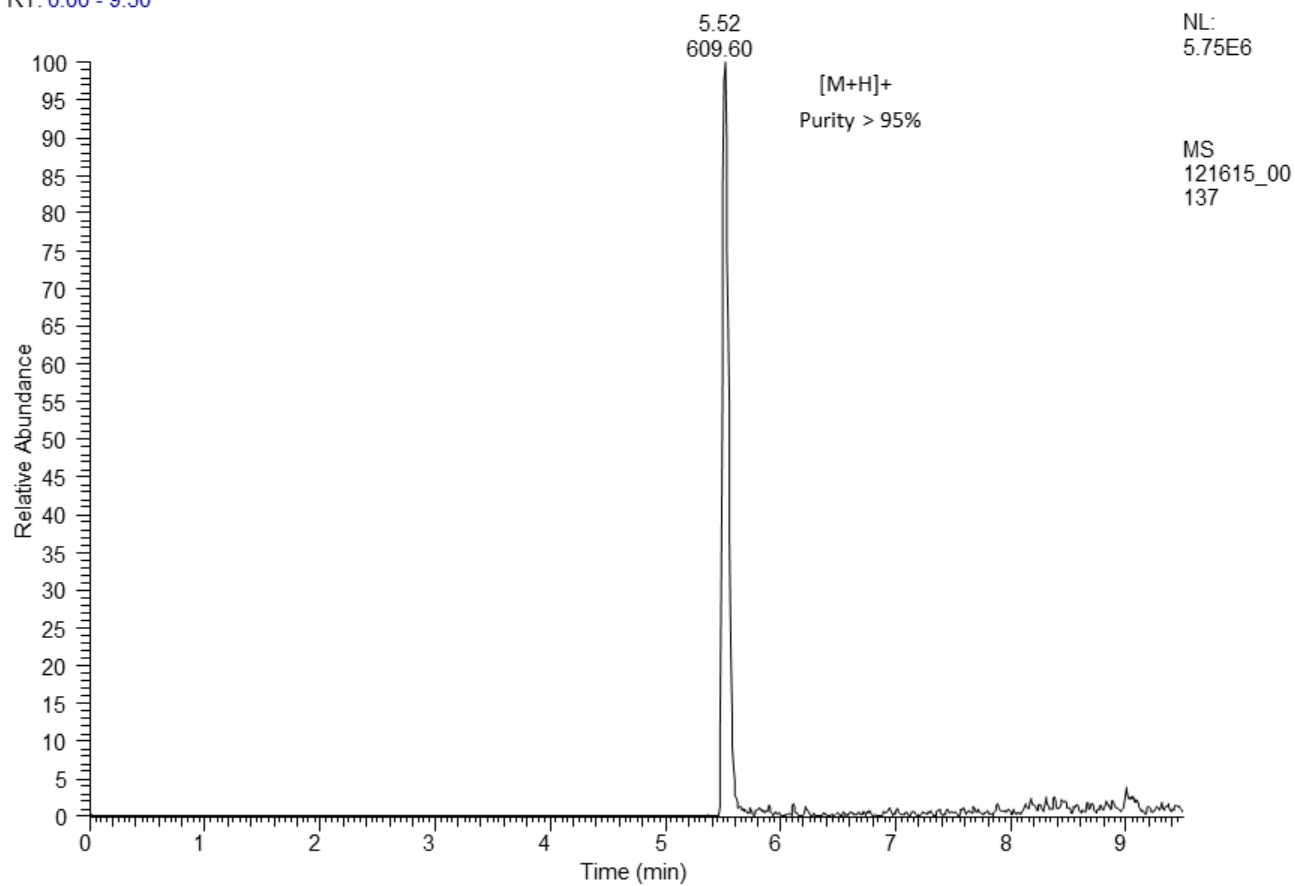

Compound 9a

RT: 0.00 - 9.50

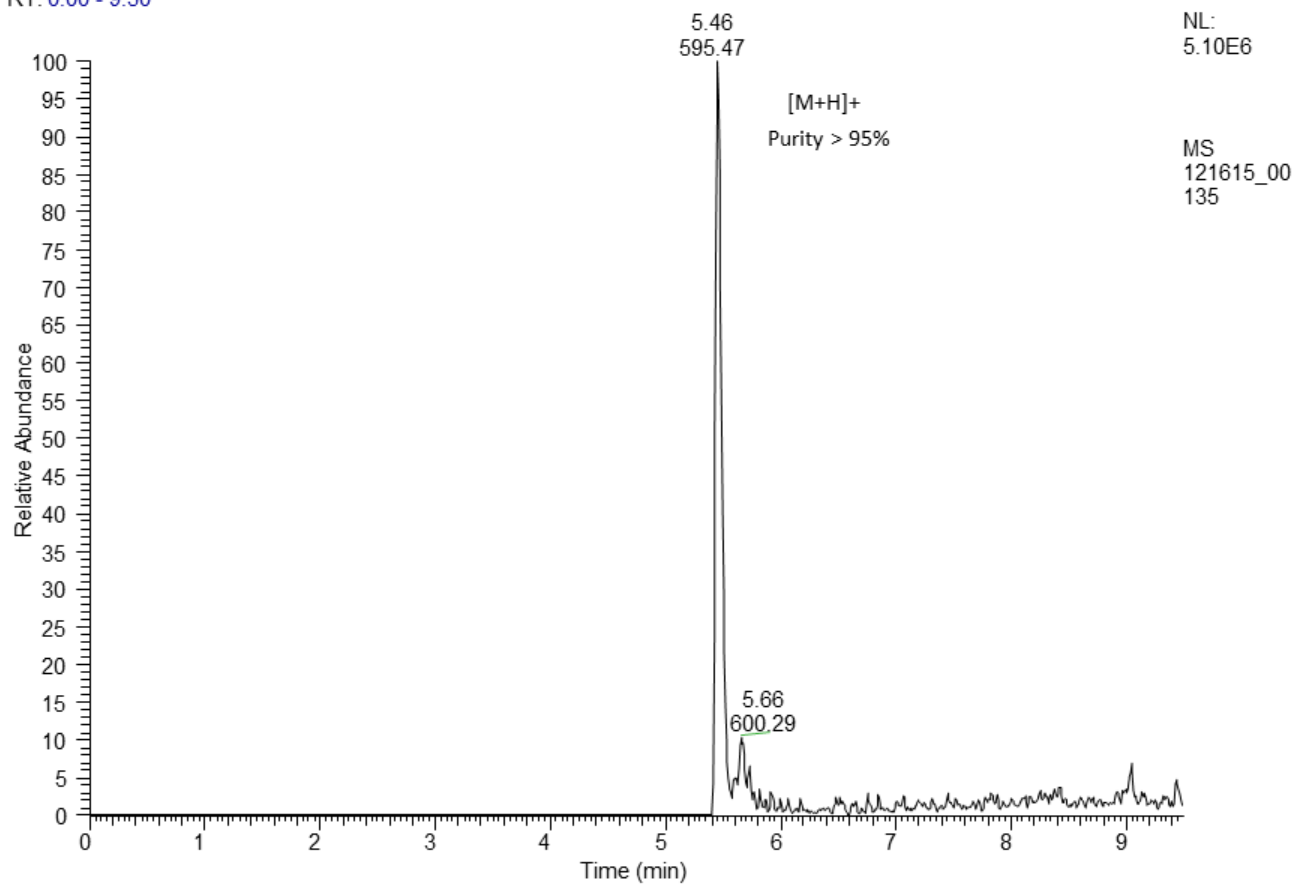

# Compound 8

RT: 0.00 - 9.50

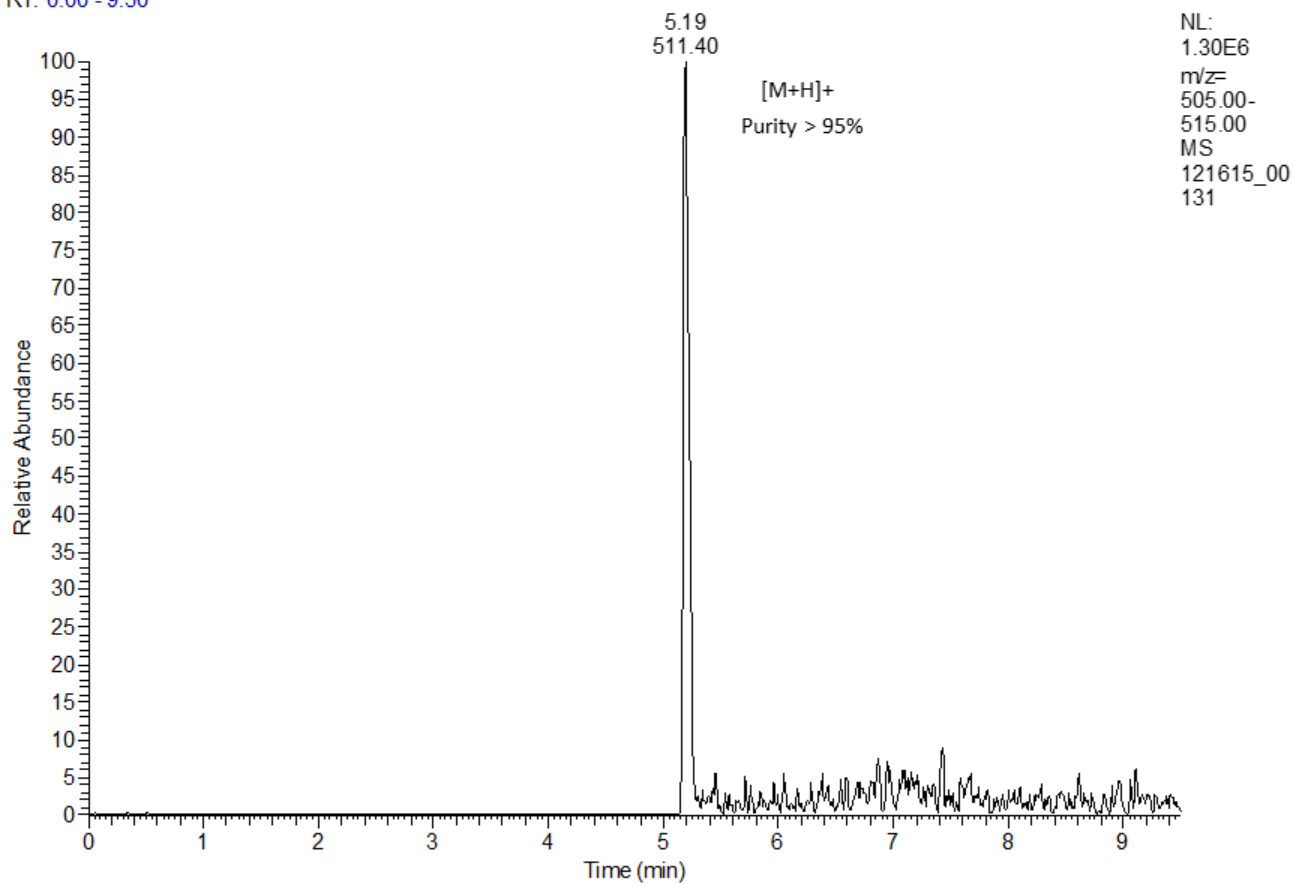

# Compound 7d

RT: 0.00 - 8.00

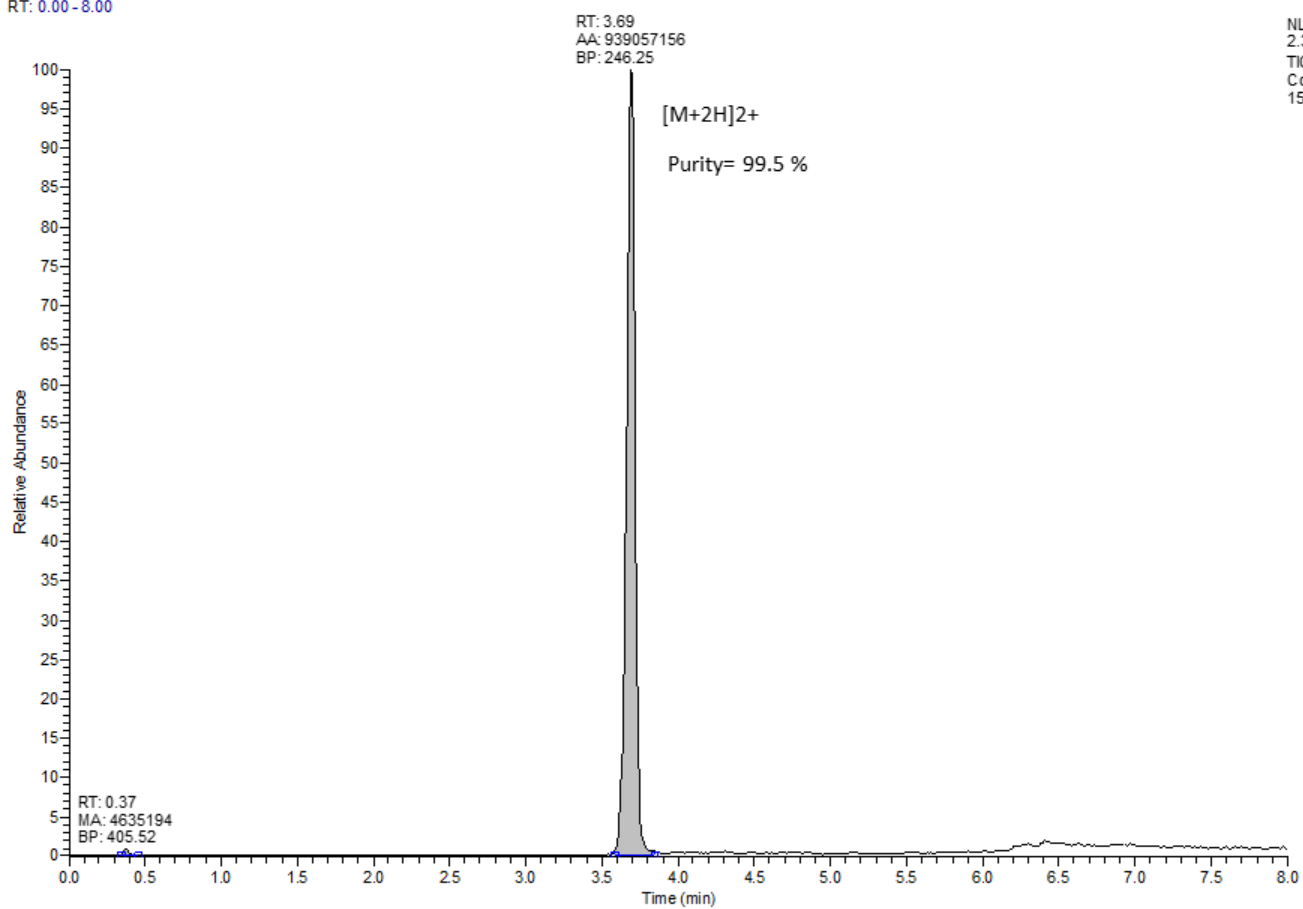

Compound 7c

RT: 0.00 - 9.50

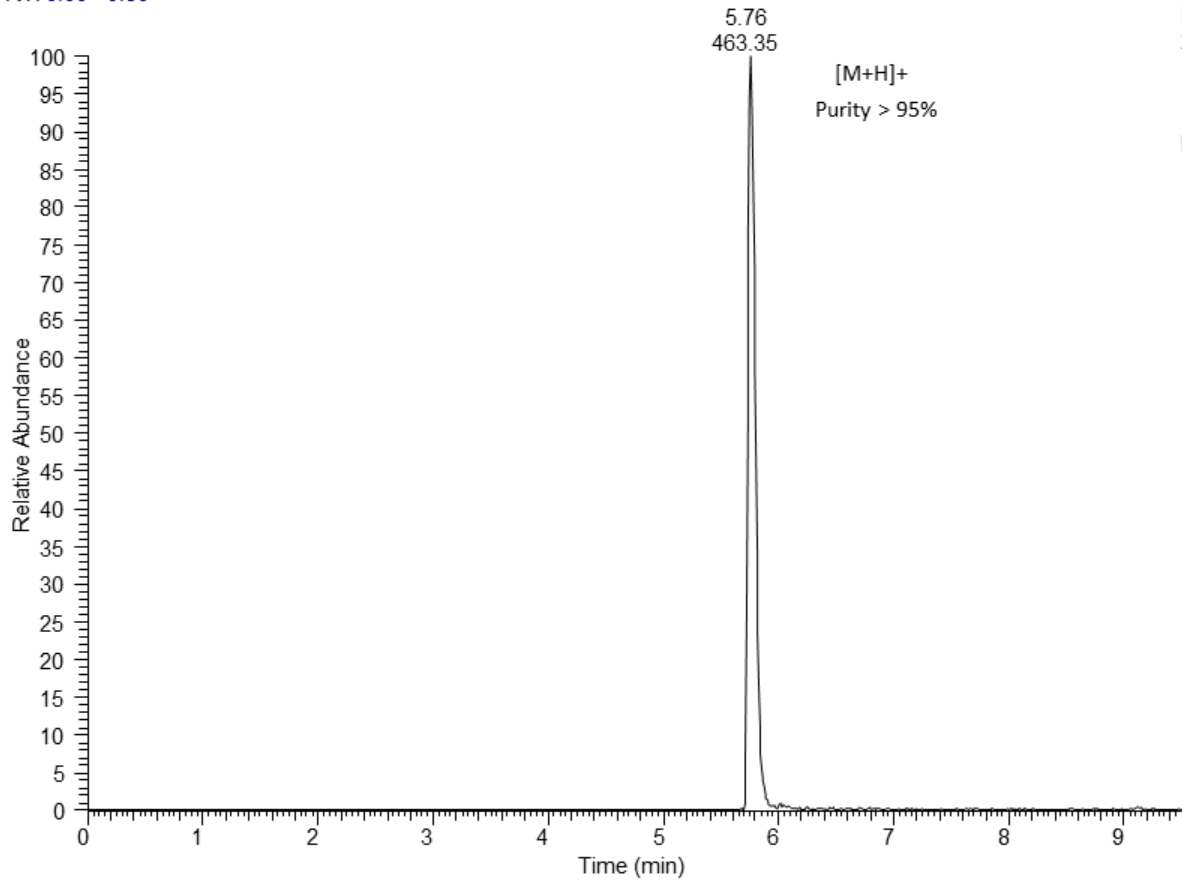

NL:  
2.69E7

MS  
121615\_00  
127



# Compound 7b

RT: 0.00 - 9.50

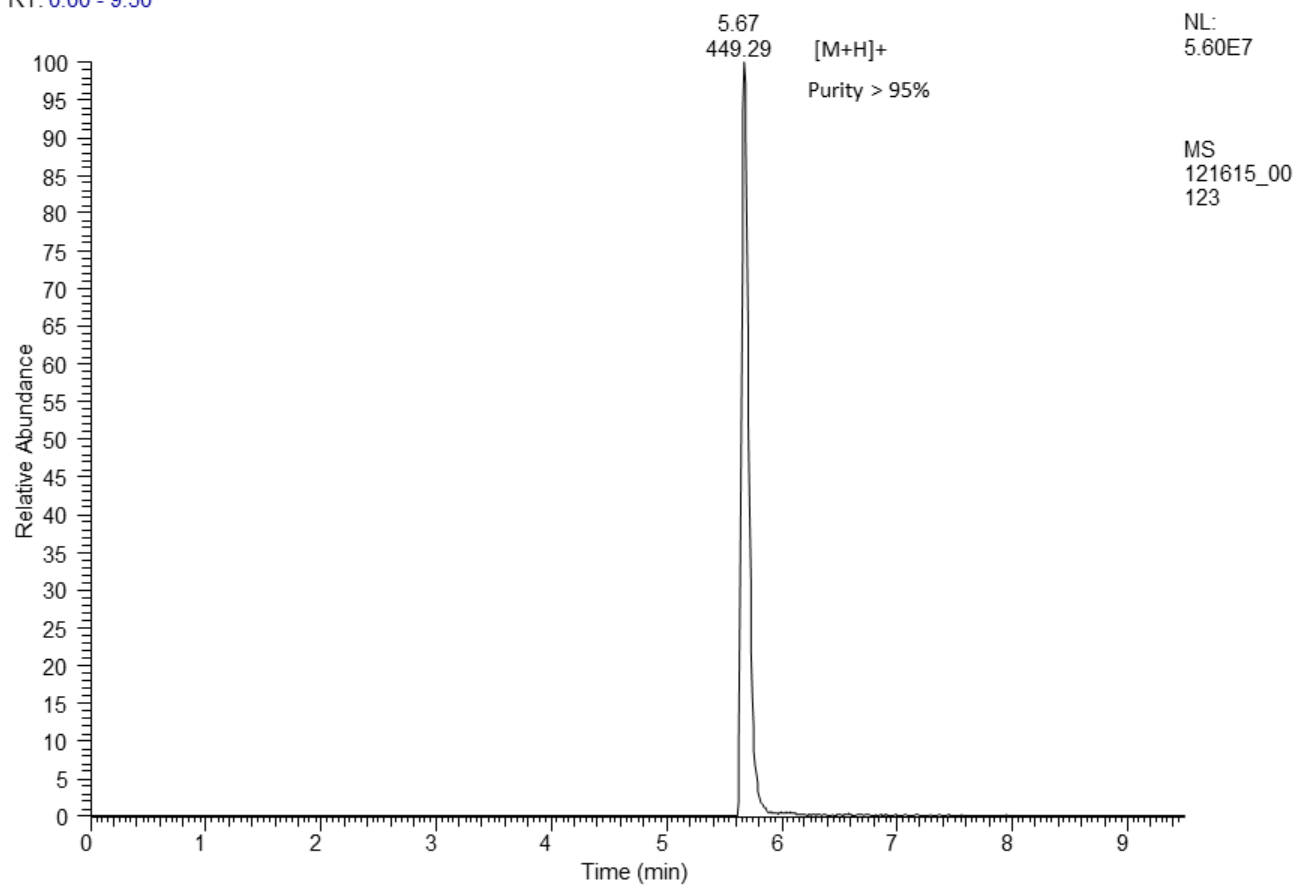

# Compound 7a

RT: 0.00 - 8.00

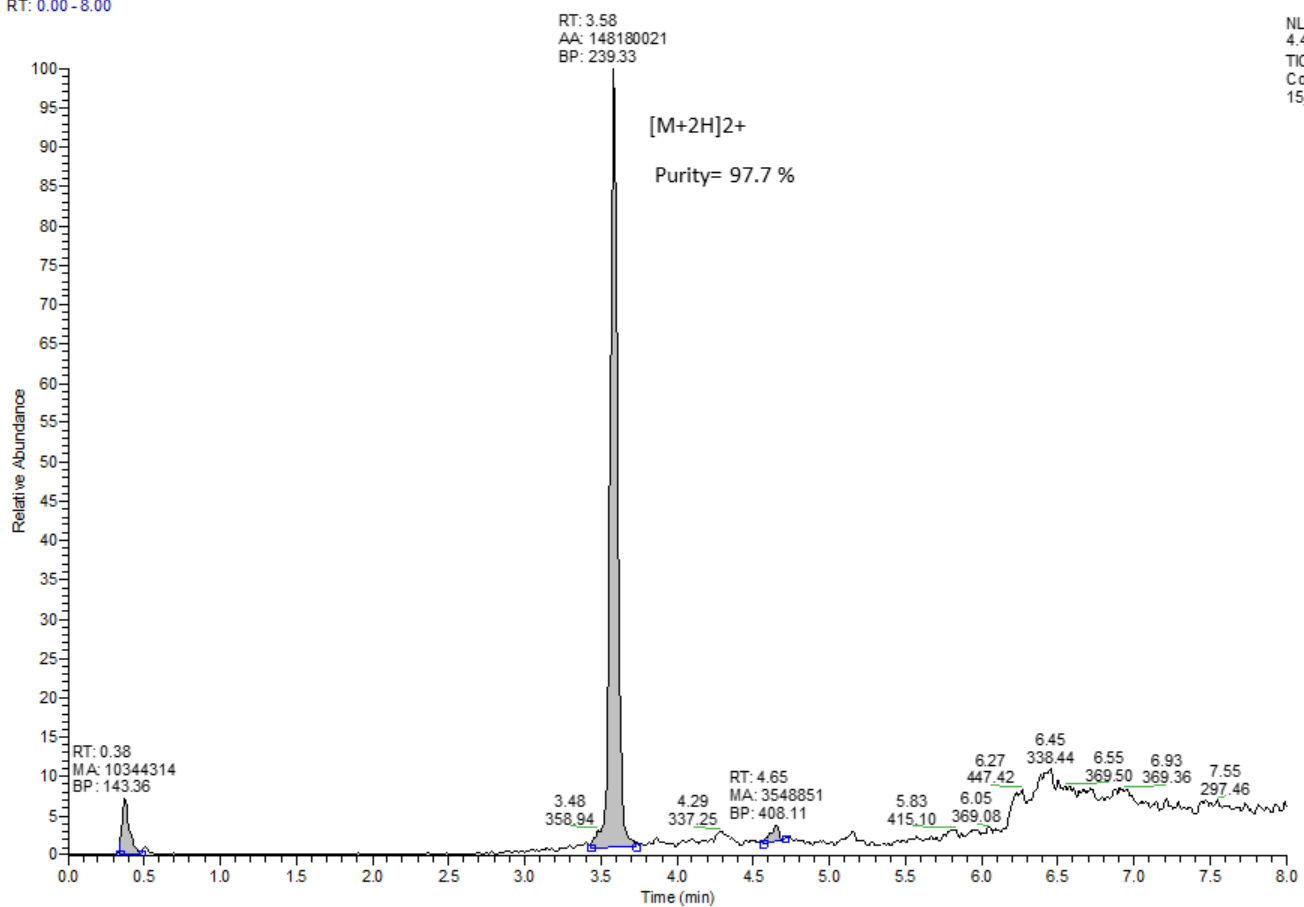

NL:  
4.42E7  
TIC MS  
Coop\_1208  
15\_00130

# Compound 6d

RT: 0.00 - 8.00

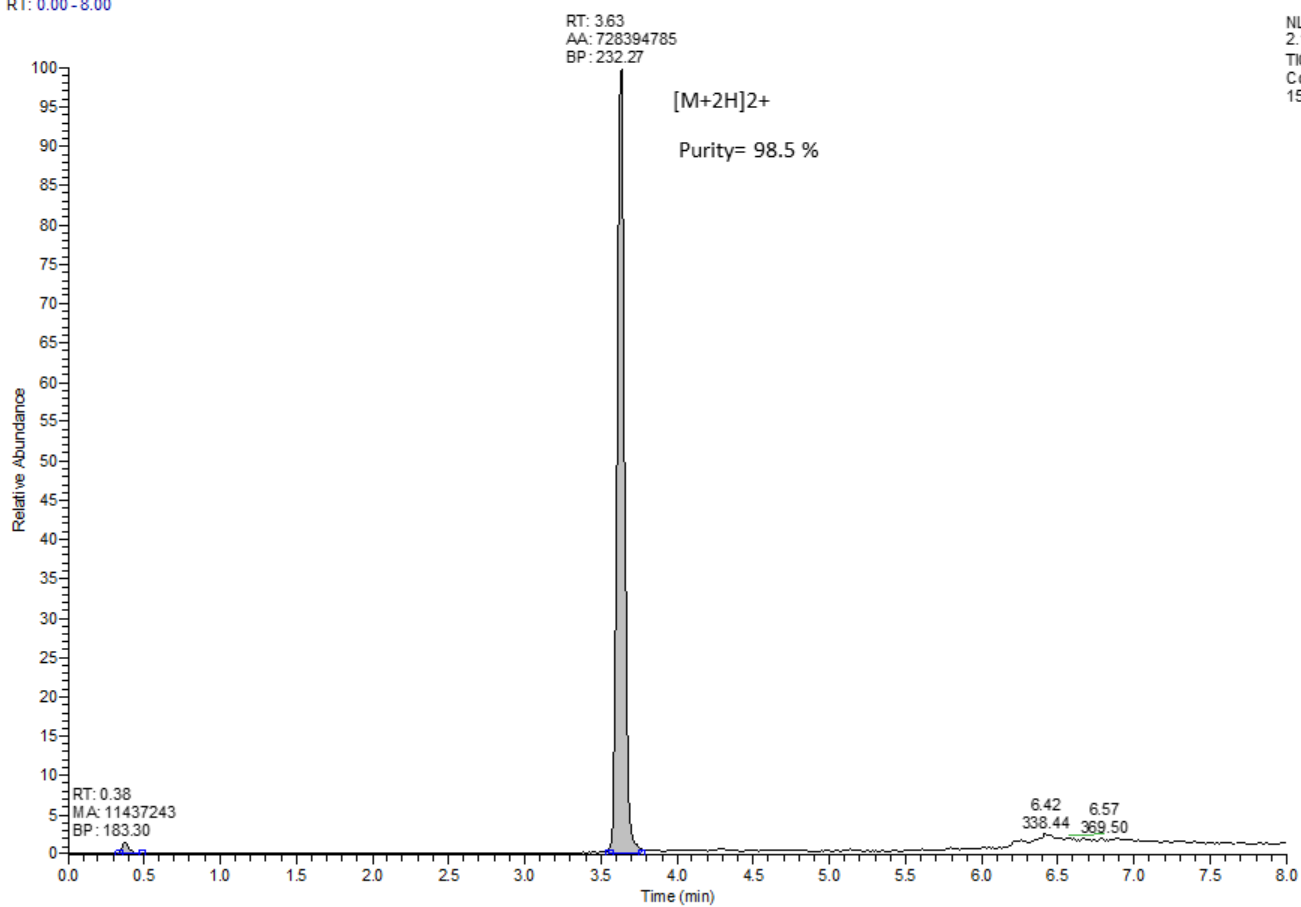

NL:  
2.18E8  
TIC MS  
Coop\_1208  
15\_00128

# Compound 6c

RT: 0.00 - 8.00

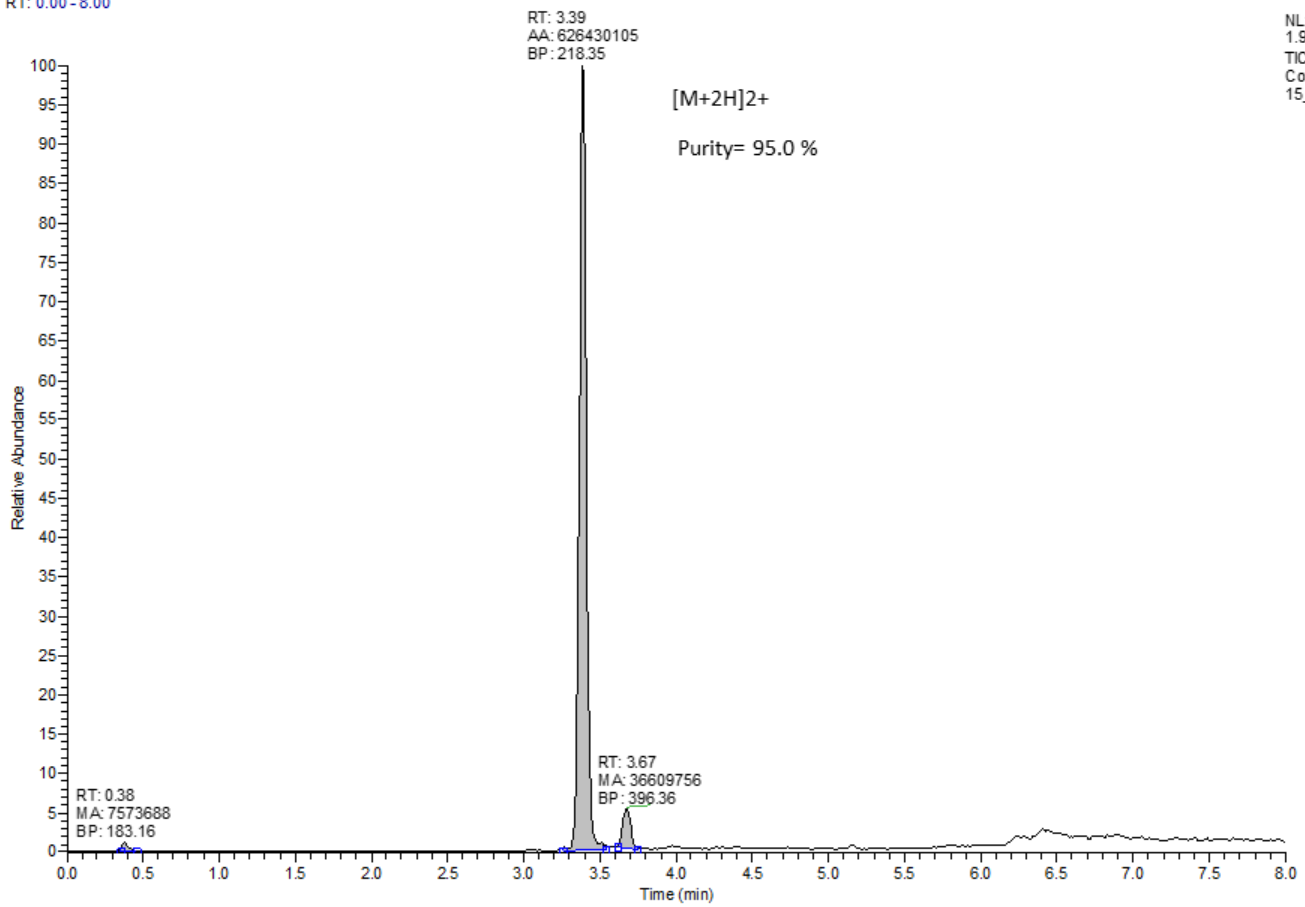

Compound 6b

RT: 0.00 - 9.50

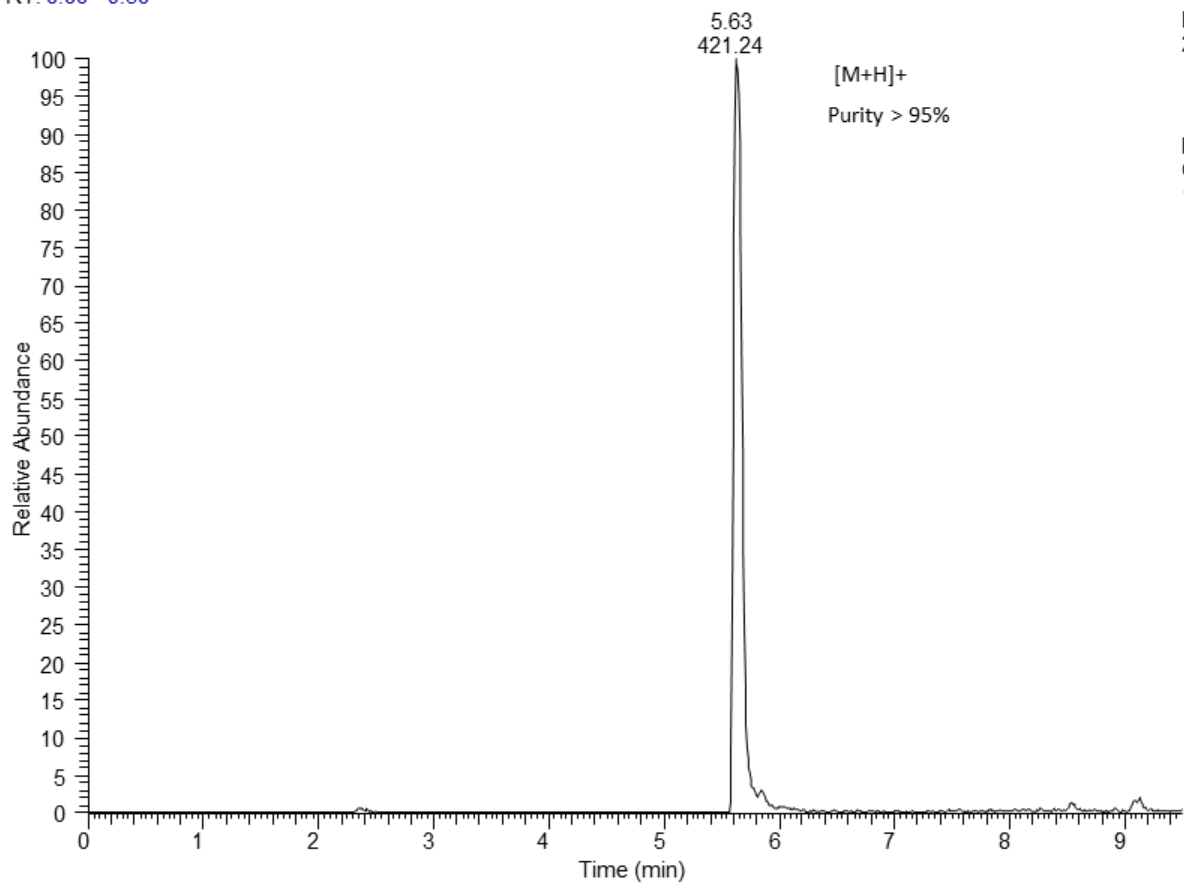

NL:  
2.91E7

MS  
Coop\_1208  
15\_00204

# Compound 6a

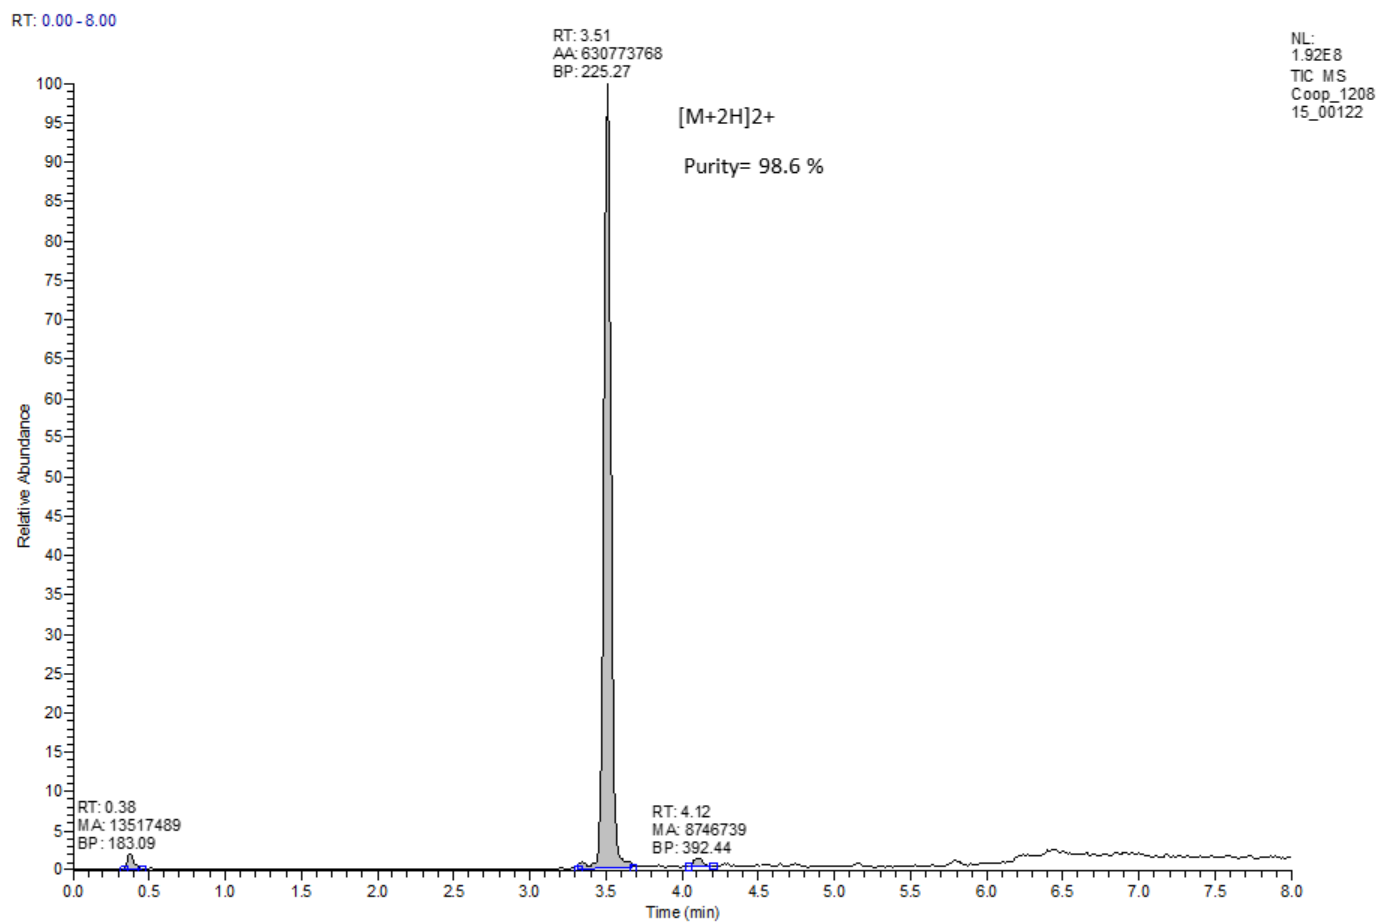

# Compound 5d

RT: 0.00 - 8.00

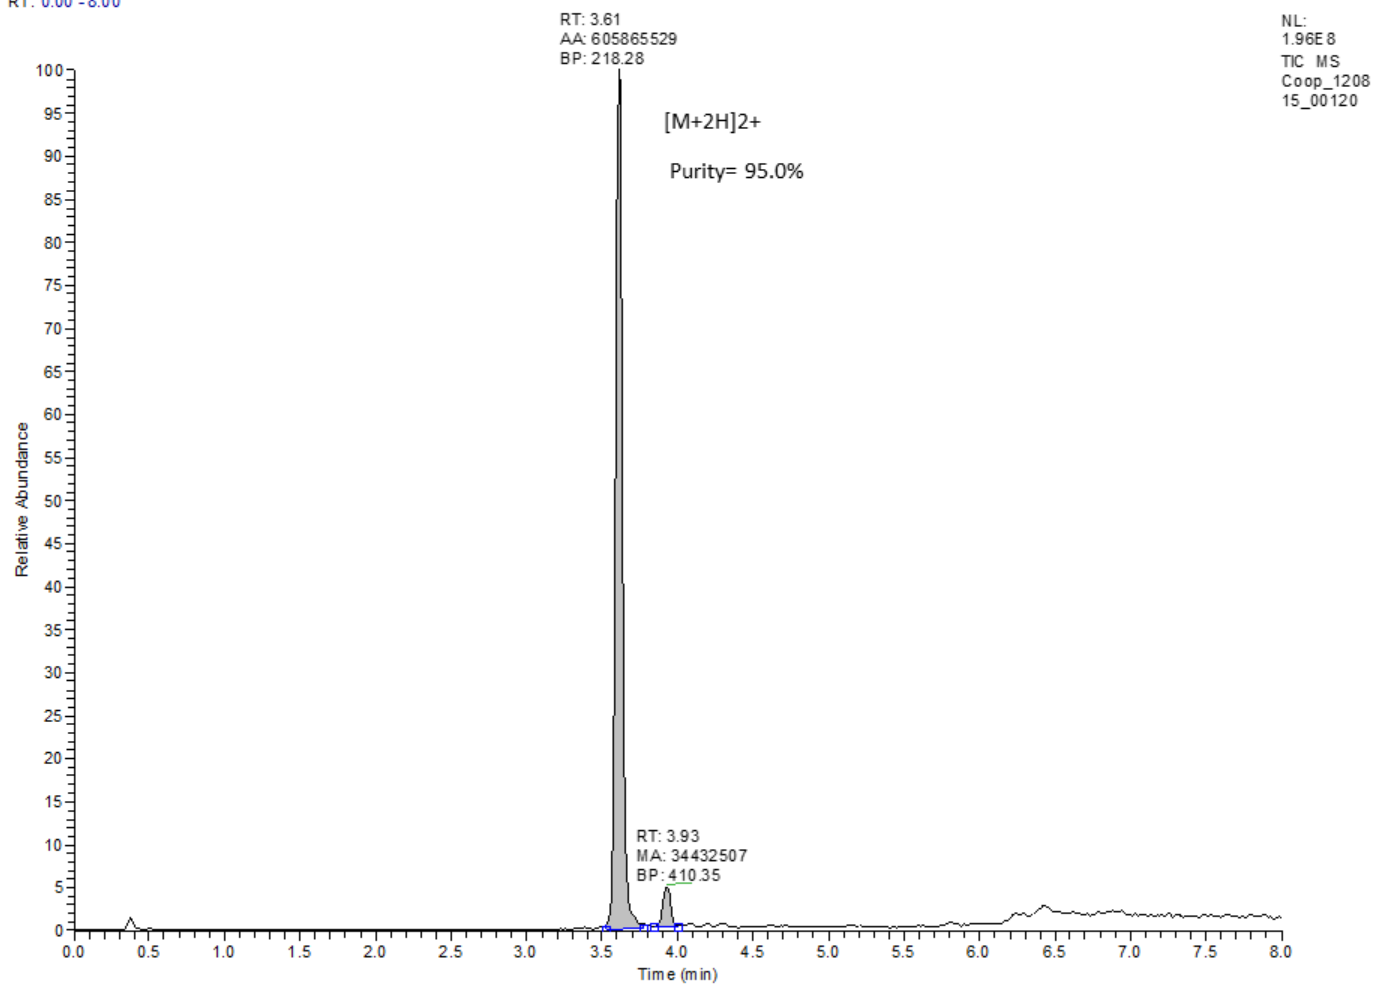

Compound 5c

RT: 0.00 - 9.50

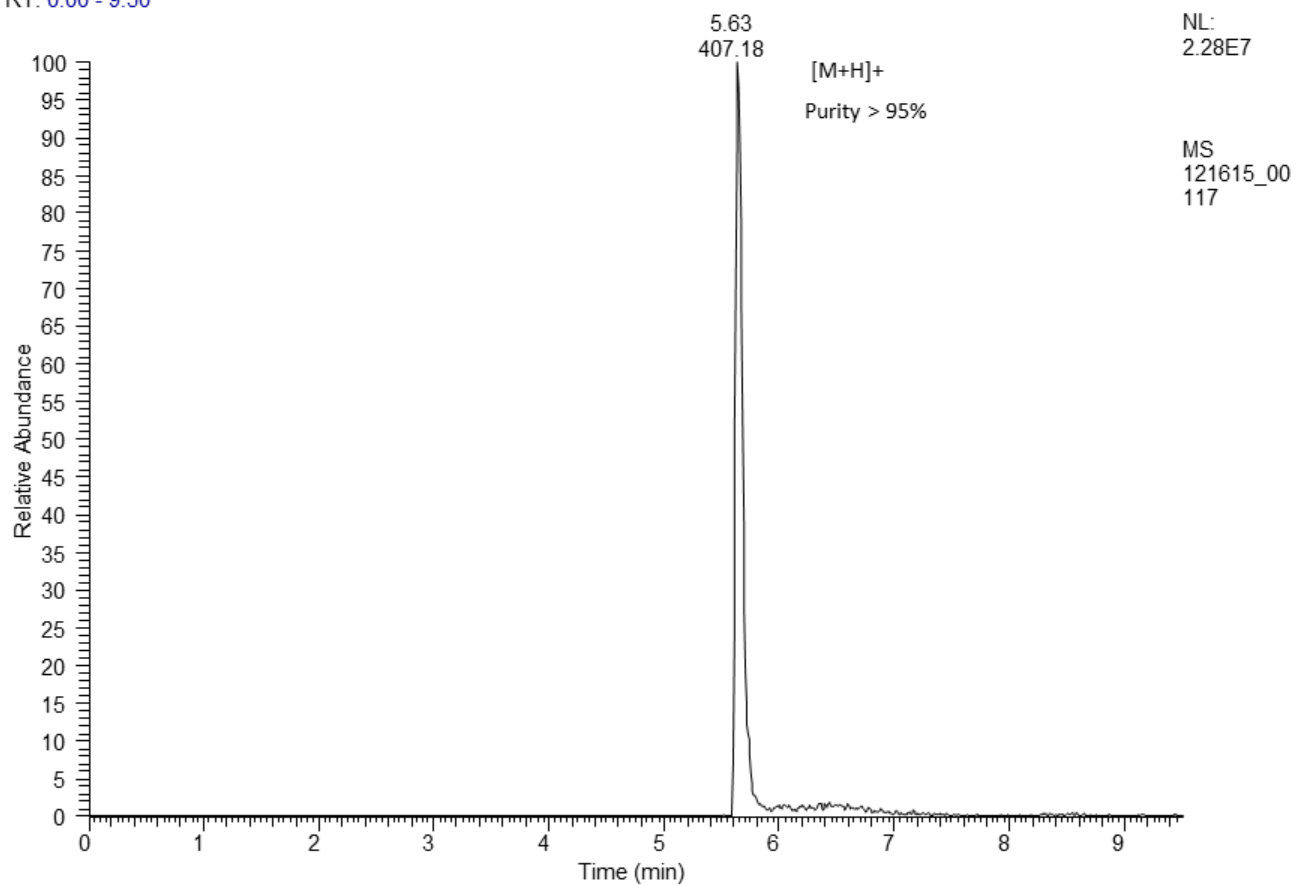



# Compound 5b

RT: 0.00 - 8.00

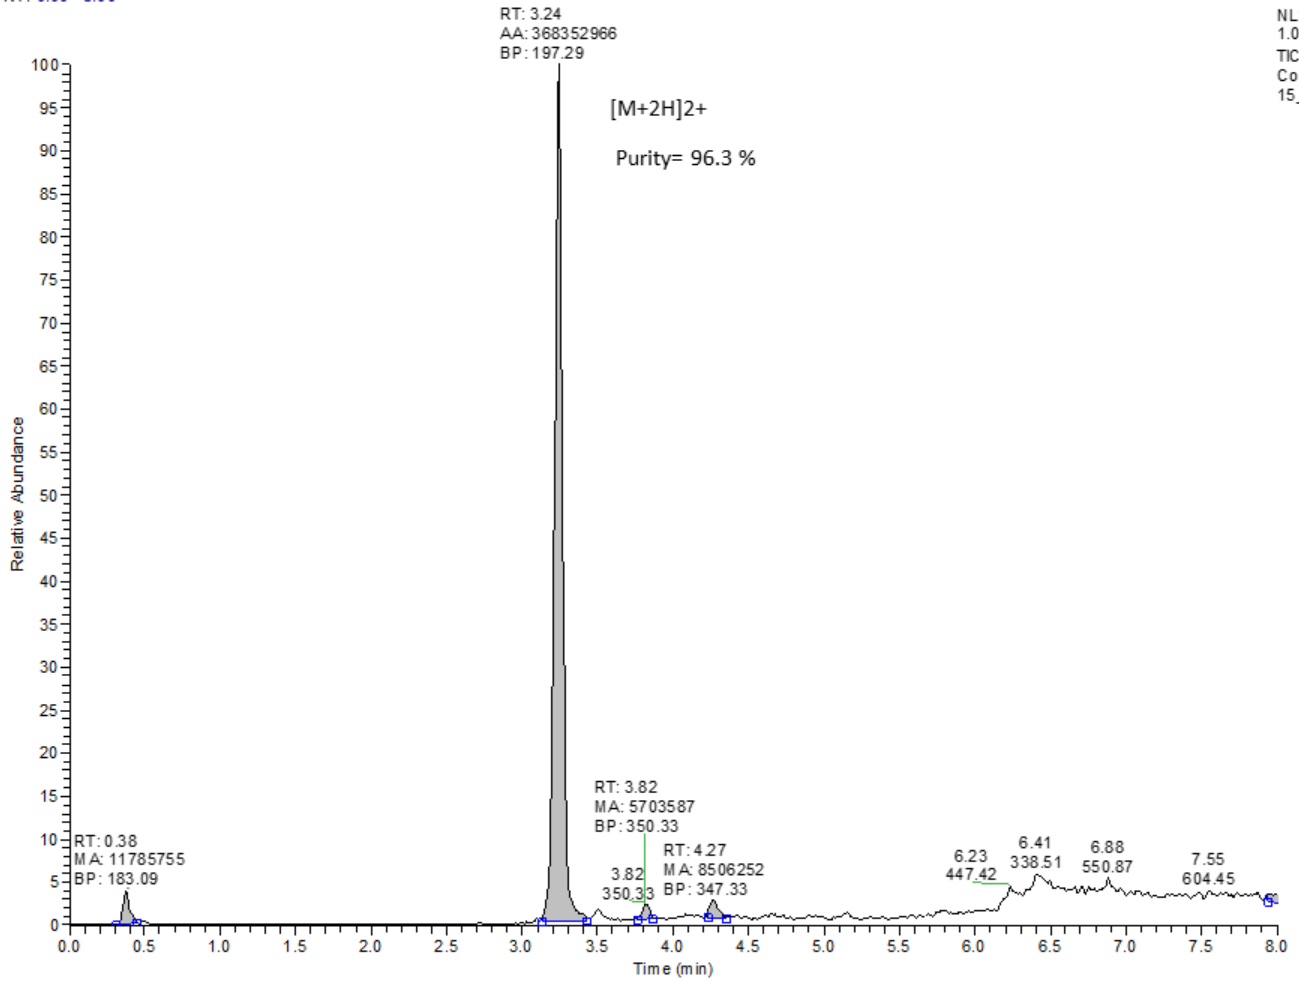

NL:  
1.01E8  
TIC MS  
Coop\_1208  
15\_00116

# Compound 5a

RT: 0.00 - 8.00

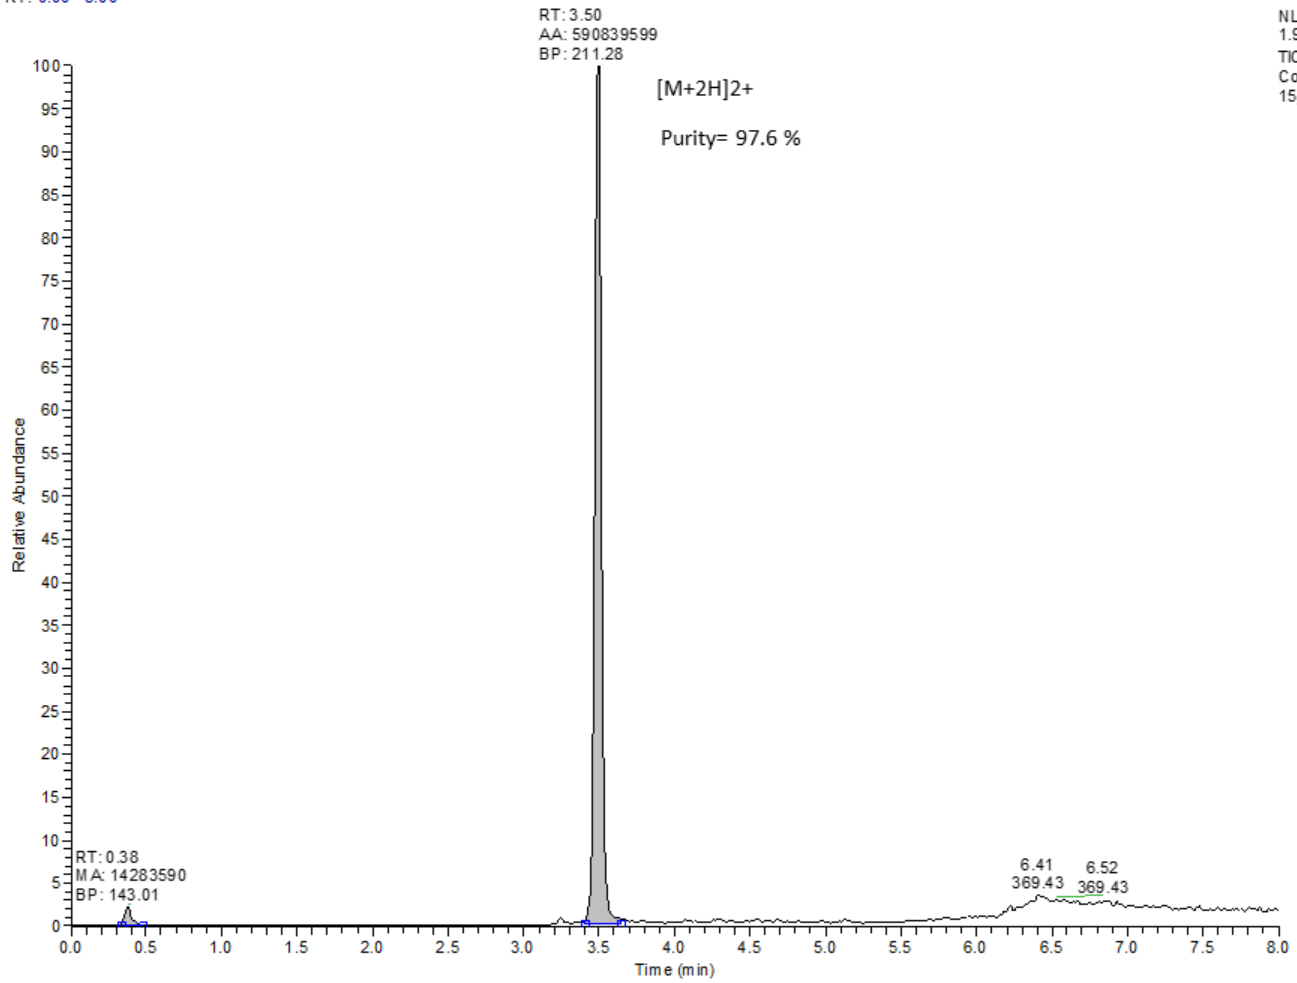

NL:  
1.94E8  
TIC MS  
Coop\_1208  
15\_00114

Compound 4c

RT: 0.00 - 9.50

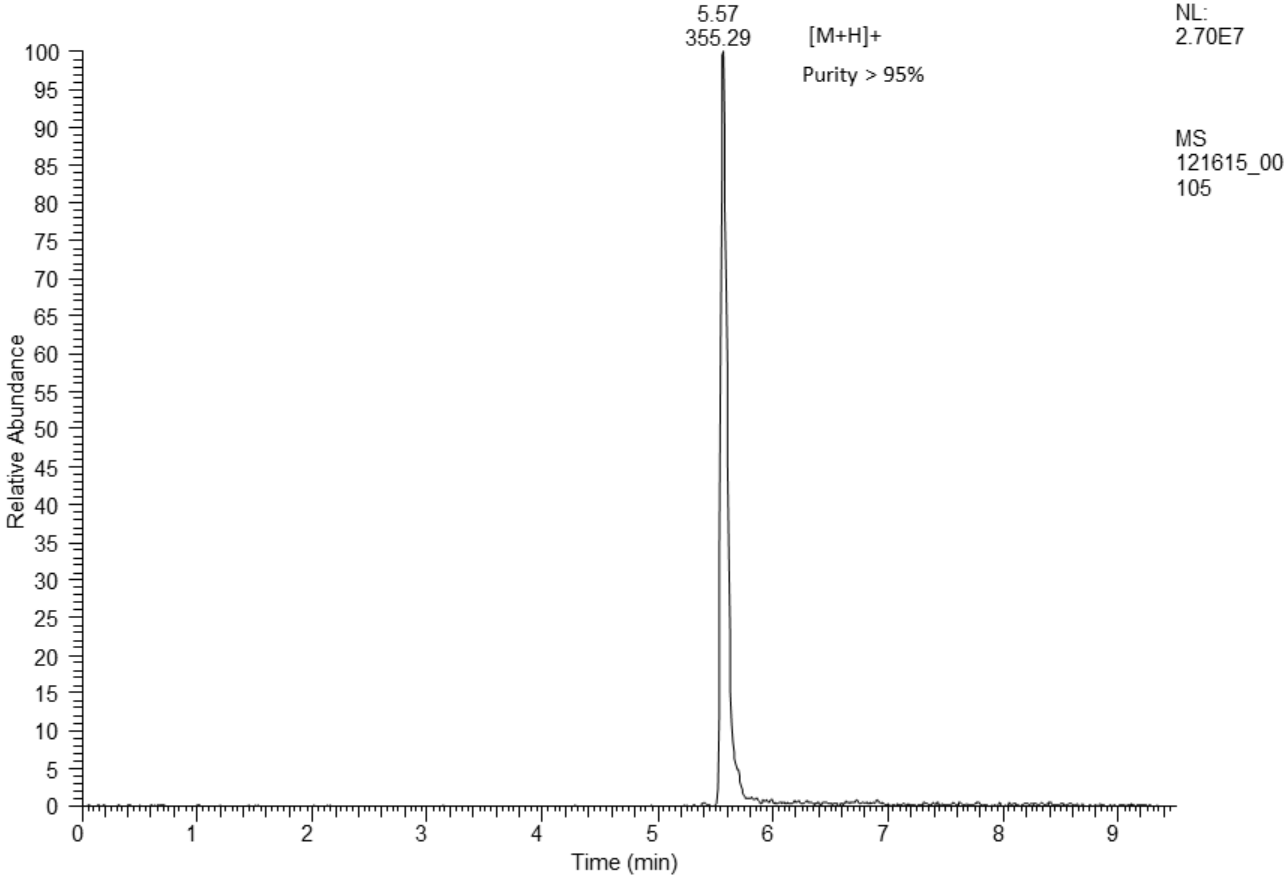

# Compound 4b

RT: 0.00 - 9.50

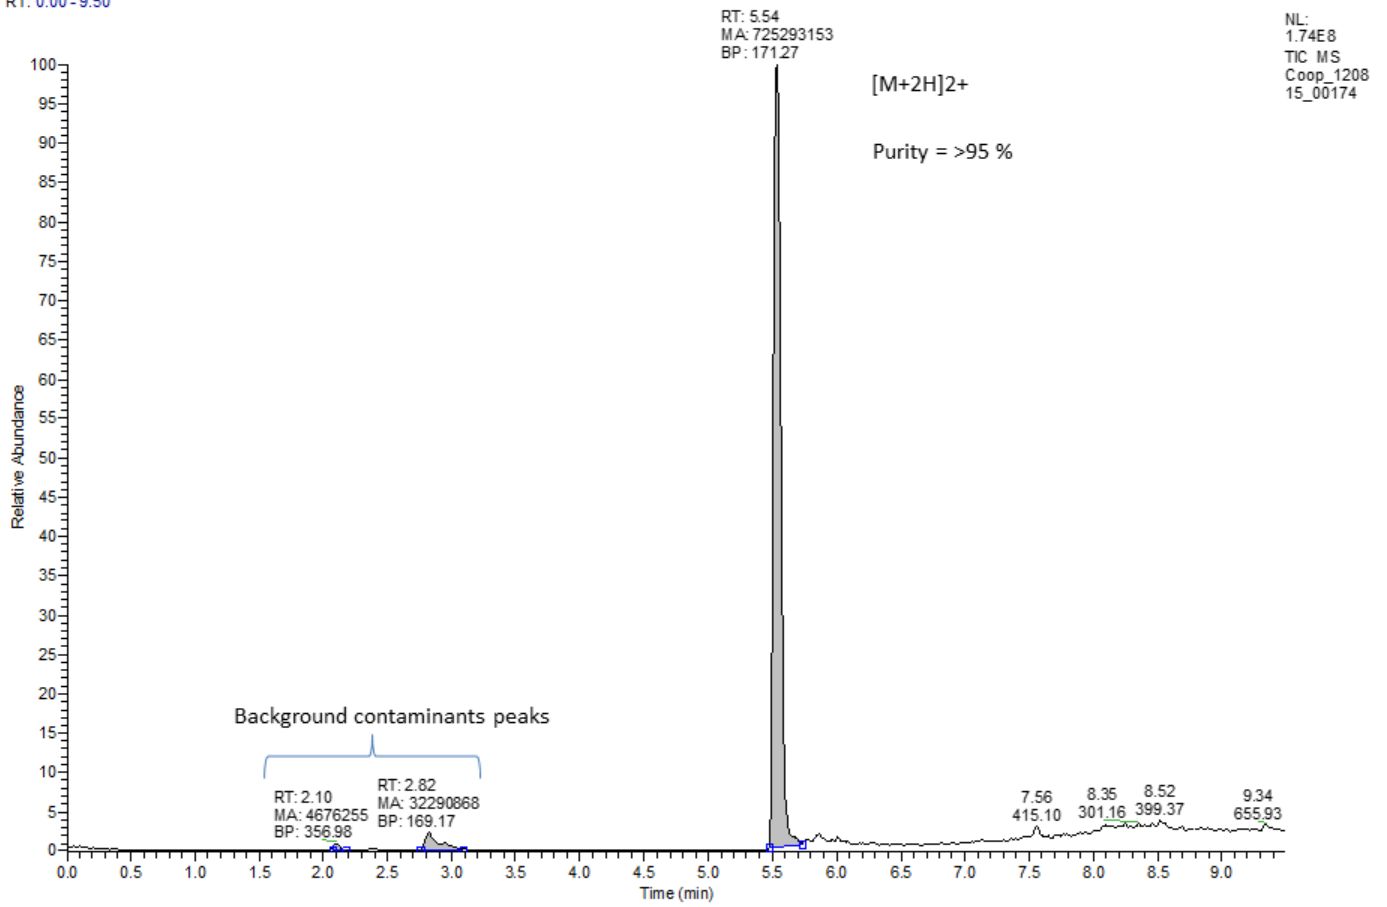

# Compound 4a

RT: 0.00 - 9.50

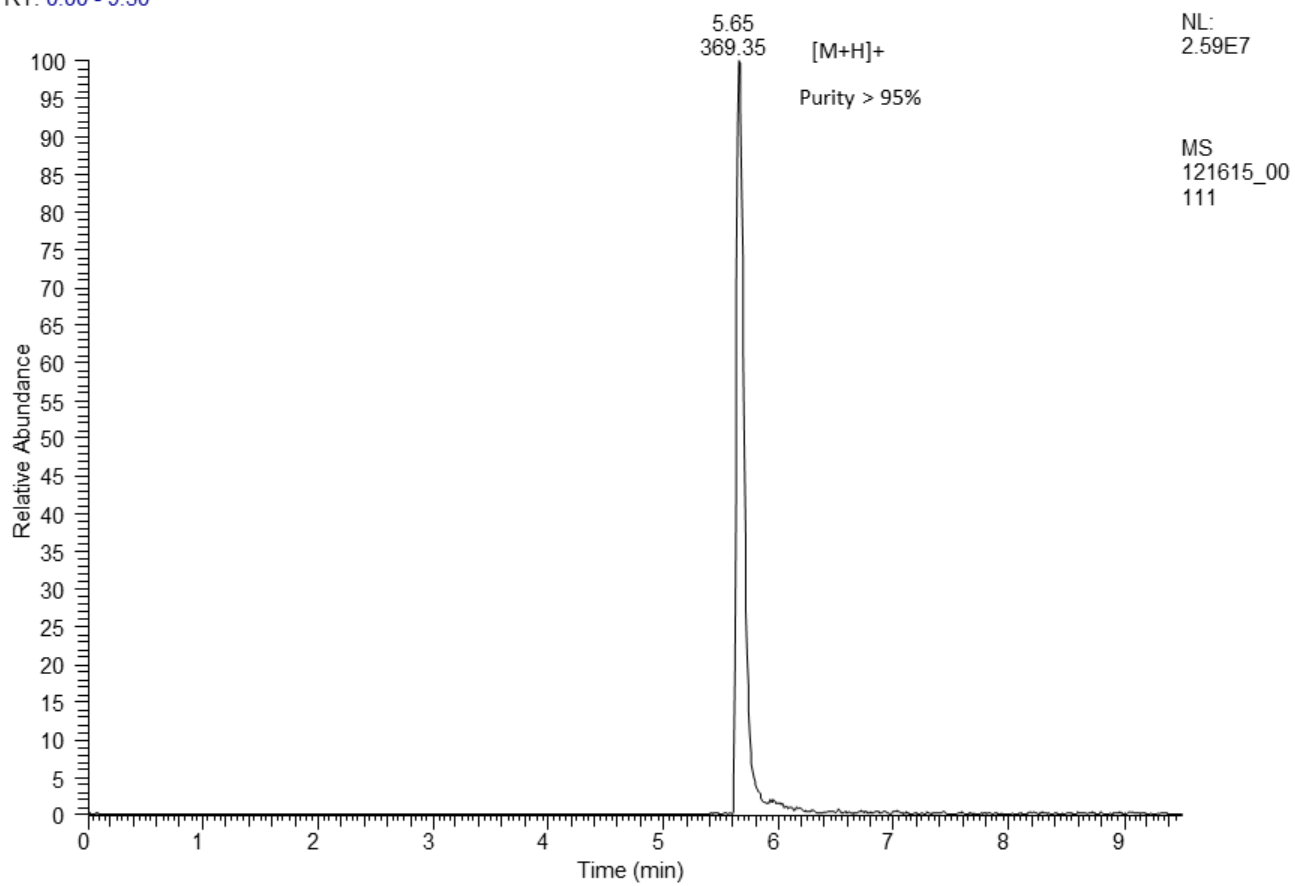

Compound 16b

RT: 0.00 - 9.50

NL:  
1.41E6

MS  
121615\_00  
145

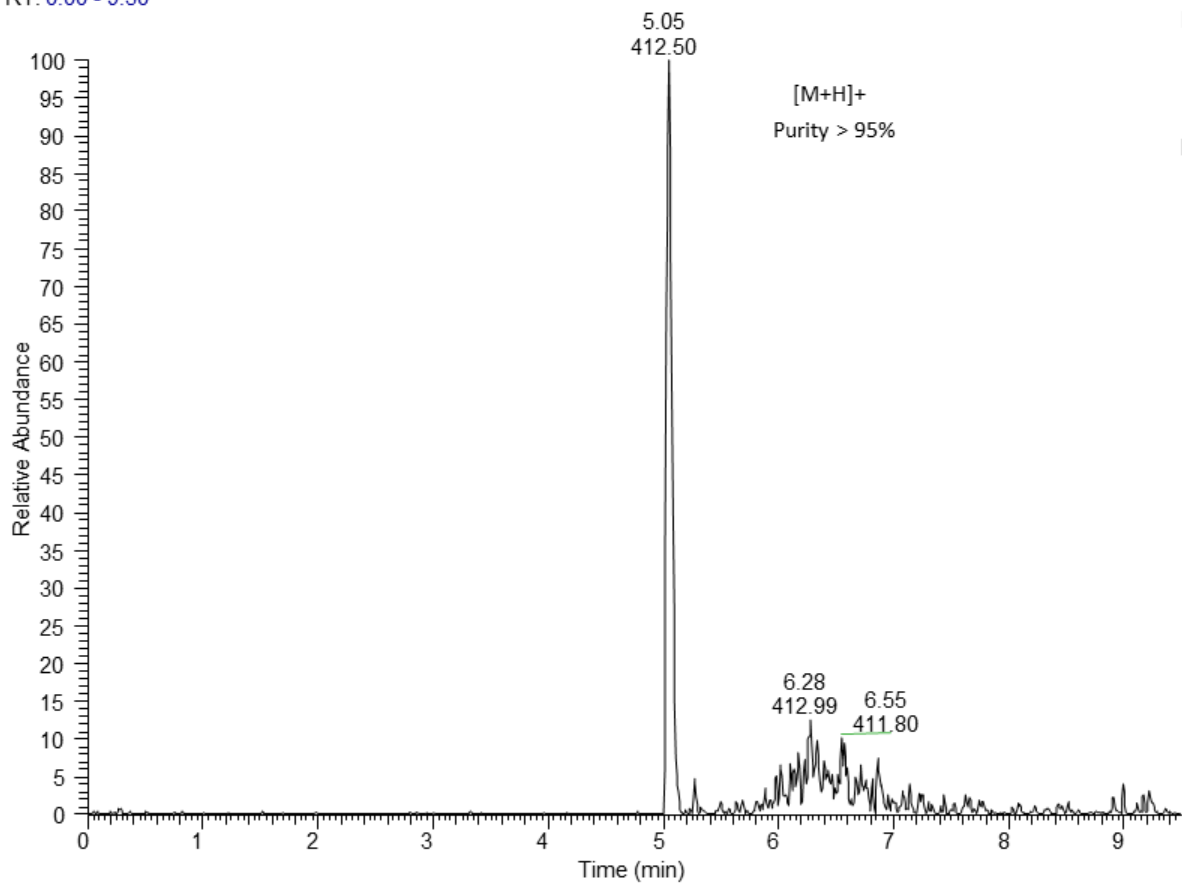

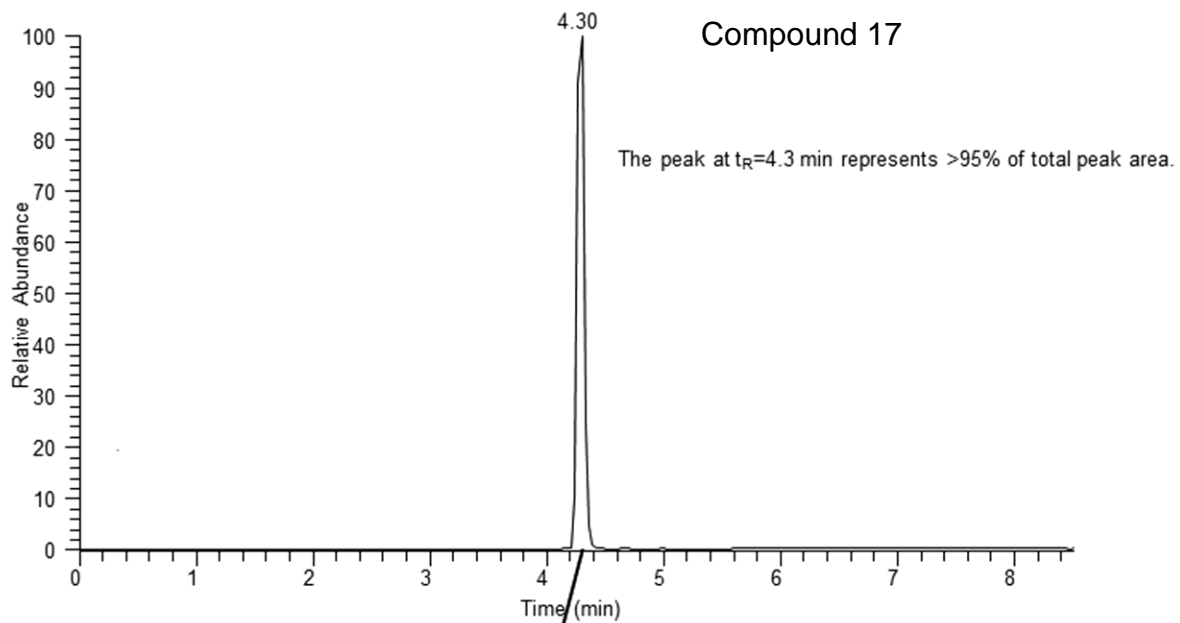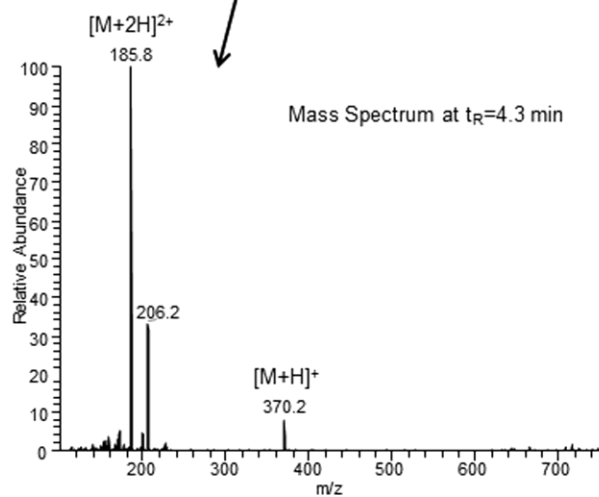

Figures S30-48(below).  $^1\text{H}$  and  $^{13}\text{C}$  NMR spectra for synthesized compounds obtained using a 500 MHz Varian NMR Spectrometer.

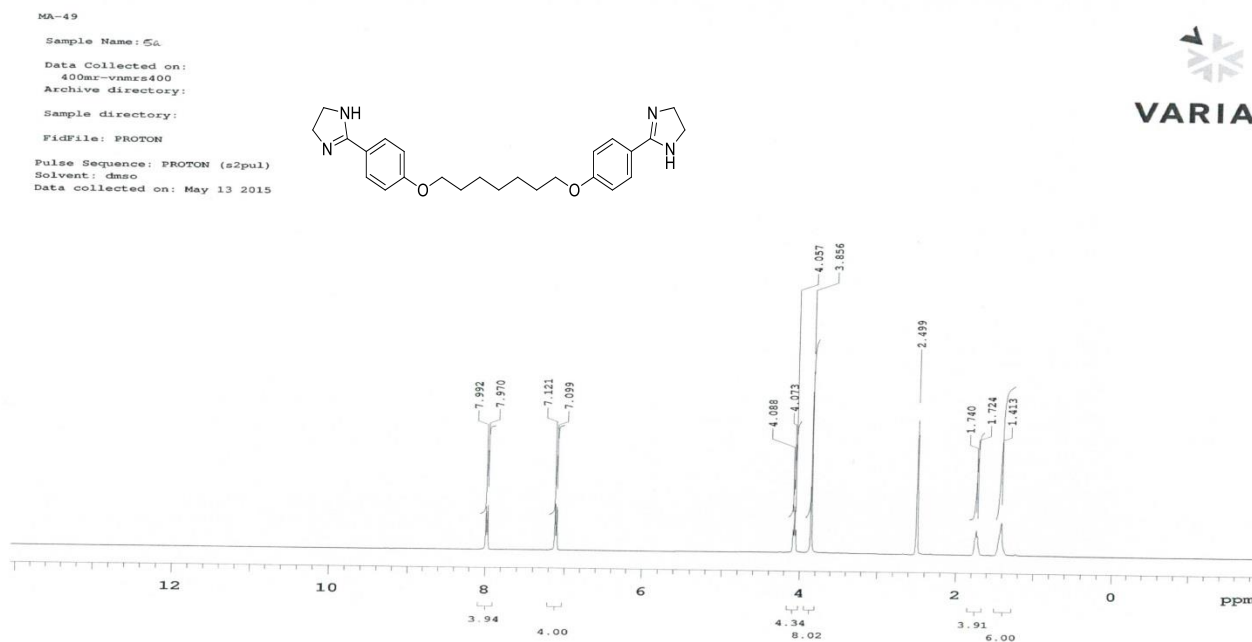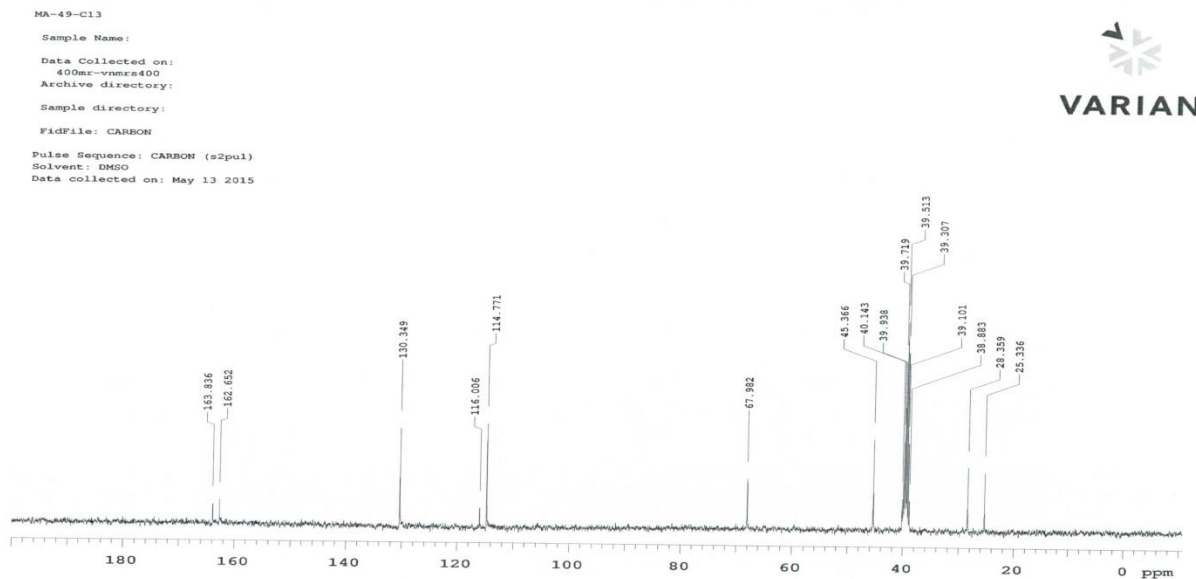

$^1\text{H}$  and  $^{13}\text{C}$  NMR of 5a



MA-48

Sample Name: 5b

Data Collected on:

400mr-vnmr400

Archive directory:

Sample directory:

FidFile: PROTON

Pulse Sequence: PROTON (s2pul)

Solvent: dmsd

Data collected on: May 13 2015

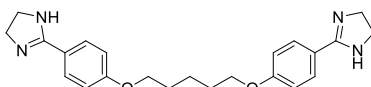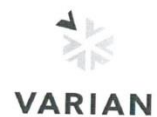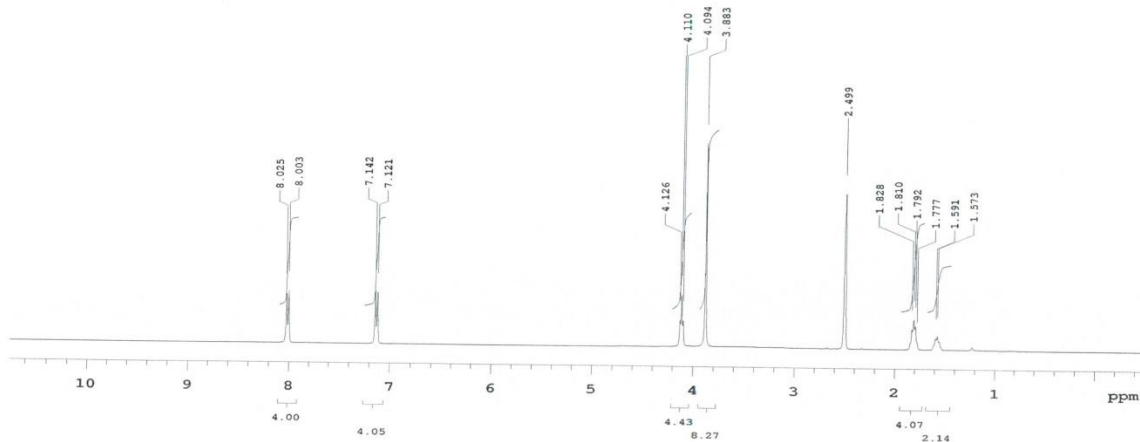

MA-48-C13

Sample Name:

Data Collected on:

400mr-vnmr400

Archive directory:

Sample directory:

FidFile: CARBON

Pulse Sequence: CARBON (s2pul)

Solvent: DMSO

Data collected on: May 13 2015

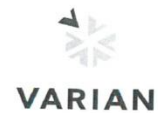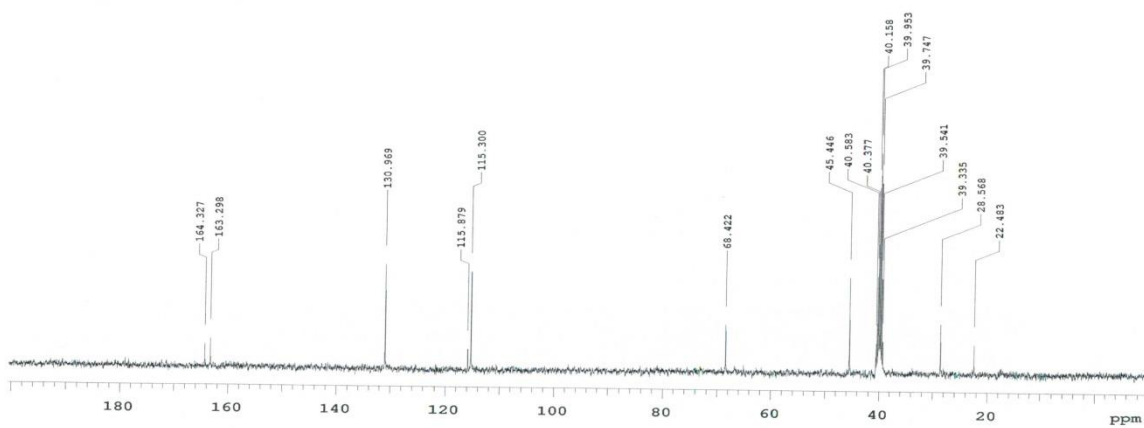

<sup>1</sup>H and <sup>13</sup>C

NMR of 5b

MA-50

Sample Name: 5c

Data Collected on:

400mr-vnmr400

Archive directory:

Sample directory:

FidFile: PROTON

Pulse Sequence: PROTON (s2pul)

Solvent: dmsd

Data collected on: May 13 2015

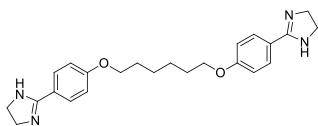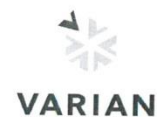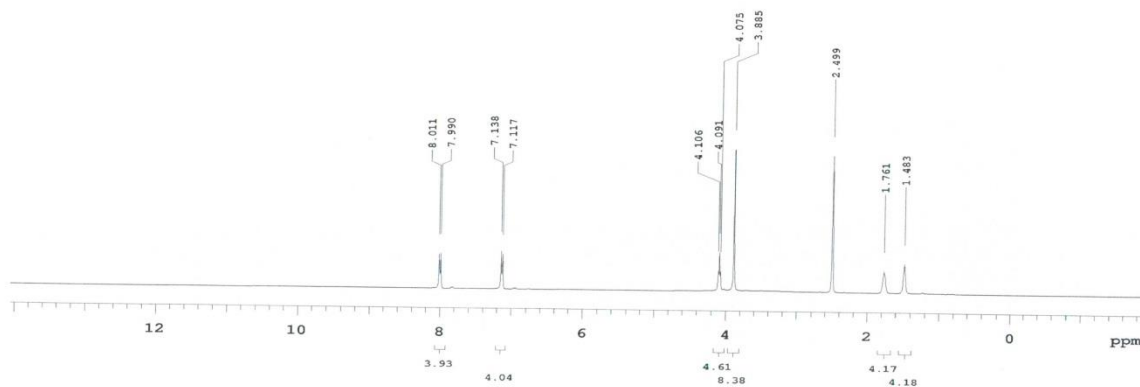

MA-50-C13

Sample Name:

Data Collected on:

400mr-vnmr400

Archive directory:

Sample directory:

FidFile: CARBON

Pulse Sequence: CARBON (s2pul)

Solvent: DMSO

Data collected on: May 13 2015

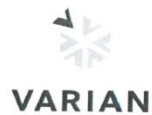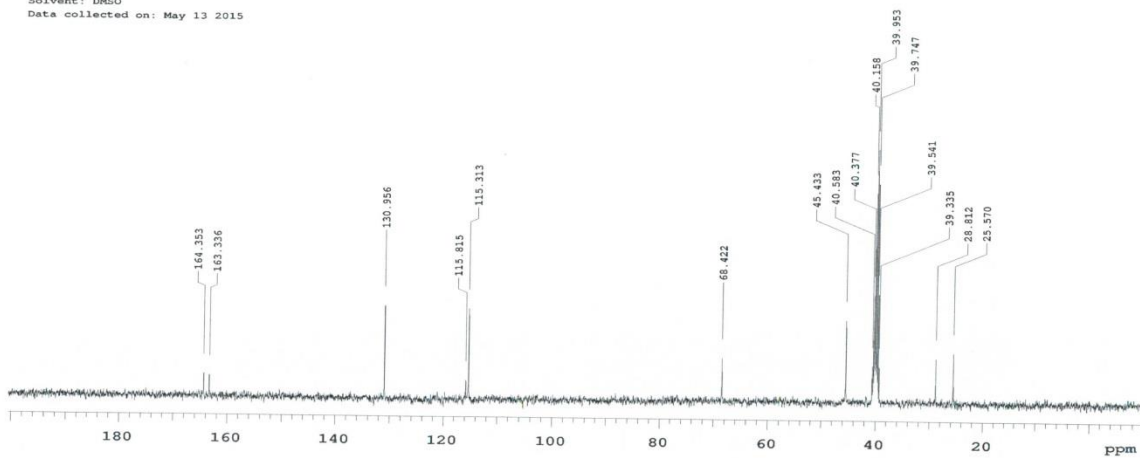

### $^1\text{H}$ and $^{13}\text{C}$ NMR of 5c

MA-45

Sample Name: 5d

Data Collected on:

400mr-vnmrs400

Archive directory:

Sample directory:

FidFile: PROTON

Pulse Sequence: PROTON (s2pul)

Solvent: dmsc

Data collected on: May 13 2015

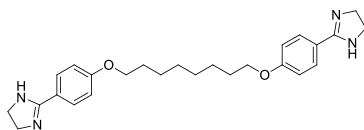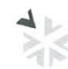

VARIAN

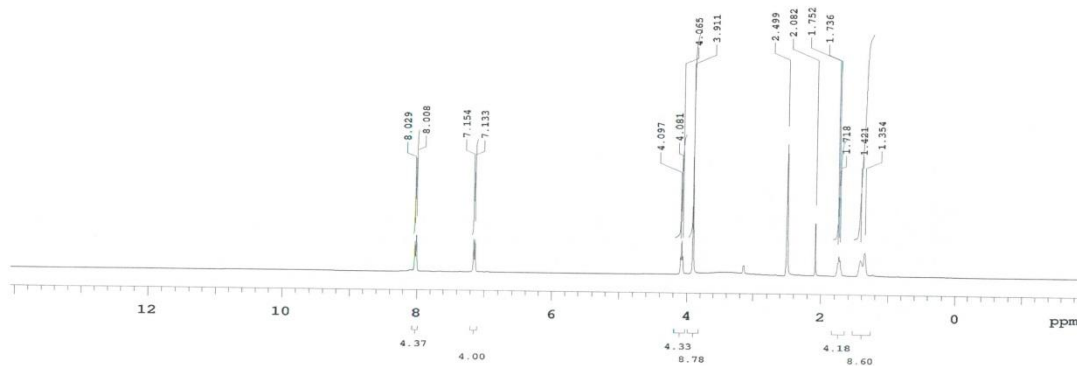

MA-45-C13

Sample Name:

Data Collected on:

400mr-vnmrs400

Archive directory:

Sample directory:

FidFile: CARBON

Pulse Sequence: CARBON (s2pul)

Solvent: DMSO

Data collected on: May 13 2015

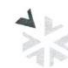

VARIAN

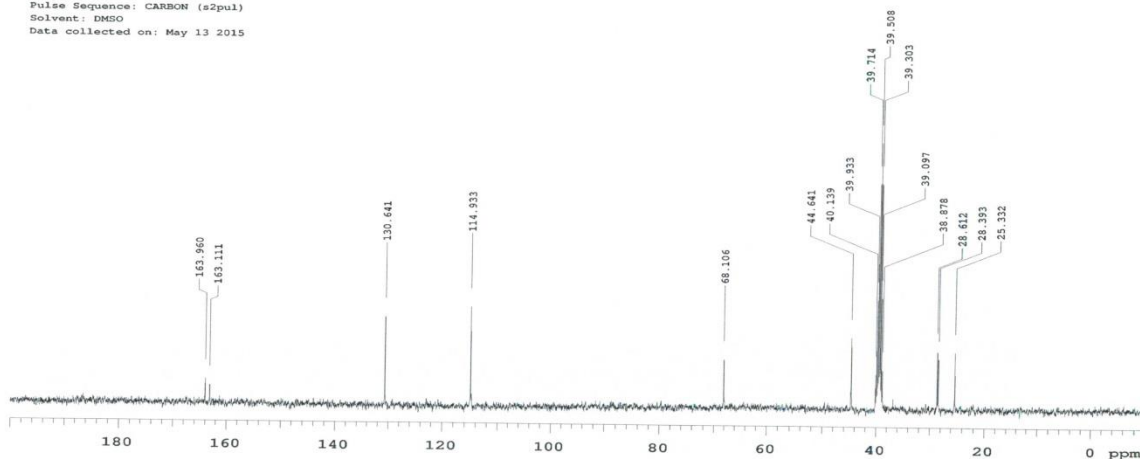

### $^1\text{H}$ and $^{13}\text{C}$ NMR of 5d

MA-38-38

Sample Name: 6a  
Data Collected on:  
400mr-vmrs400  
Archive directory:  
Sample directory:  
FidFile: PROTON

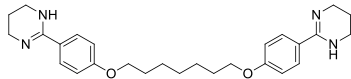

Pulse Sequence: PROTON (s2pul)  
Solvent: dms  
Data collected on: Mar 23 2015

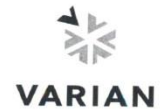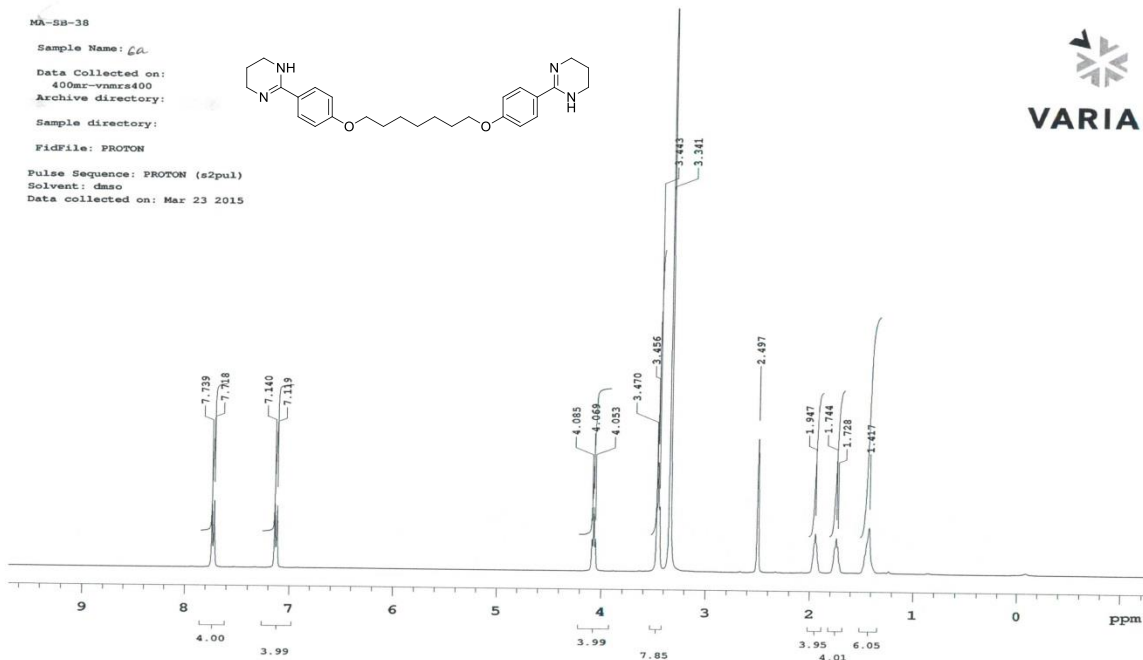

MA-38-C-13-MAY-11

Sample Name:  
Data Collected on:  
400mr-vmrs400  
Archive directory:  
Sample directory:  
FidFile: CARBON  
Pulse Sequence: CARBON (s2pul)  
Solvent: DMSO  
Data collected on: May 11 2015

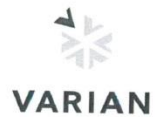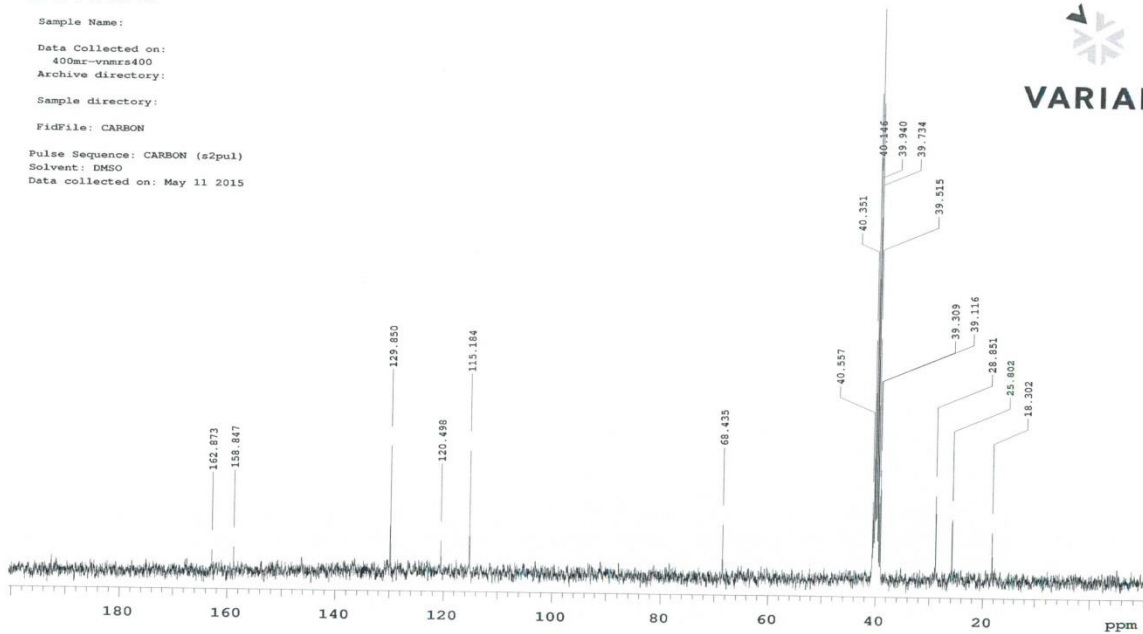

### <sup>1</sup>H and <sup>13</sup>C NMR of 6a

MA-SB-39  
 Sample Name: **6b**  
 Data Collected on:  
 400mr-vnmr400  
 Archive directory:  
 Sample directory:  
 FidFile: PROTON  
 Pulse Sequence: PROTON (s2pul)  
 Solvent: dmsd  
 Data collected on: Mar 31 2015

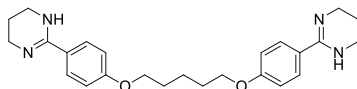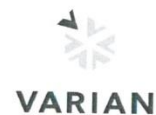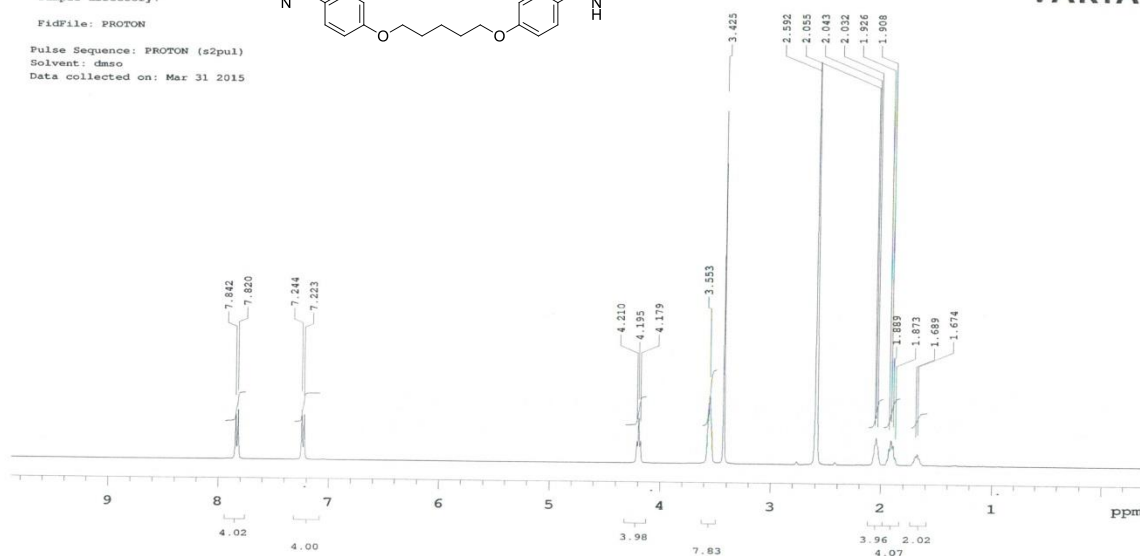

MA-39-C-13-MAY-11  
 Sample Name:  
 Data Collected on:  
 400mr-vnmr400  
 Archive directory:  
 Sample directory:  
 FidFile: CARBON  
 Pulse Sequence: CARBON (s2pul)  
 Solvent: DMSO  
 Data collected on: May 11 2015

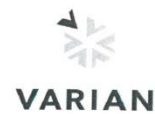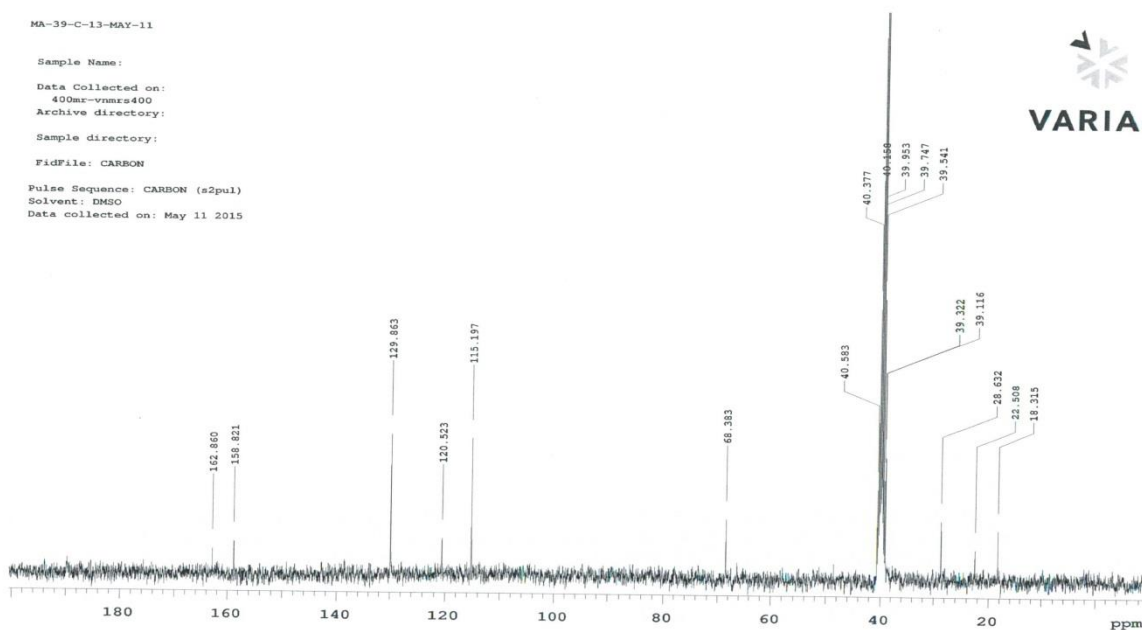

<sup>1</sup>H and <sup>13</sup>C

NMR of 6b

6c

MA-SB-43

Sample Name:

Data Collected on:

400mr-vnmrs400

Archive directory:

Sample directory:

FidFile: PROTON

Pulse Sequence: PROTON (s2pul)

Solvent: dms

Data collected on: Mar 31 2015

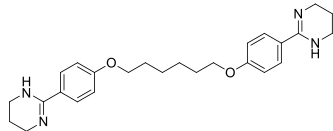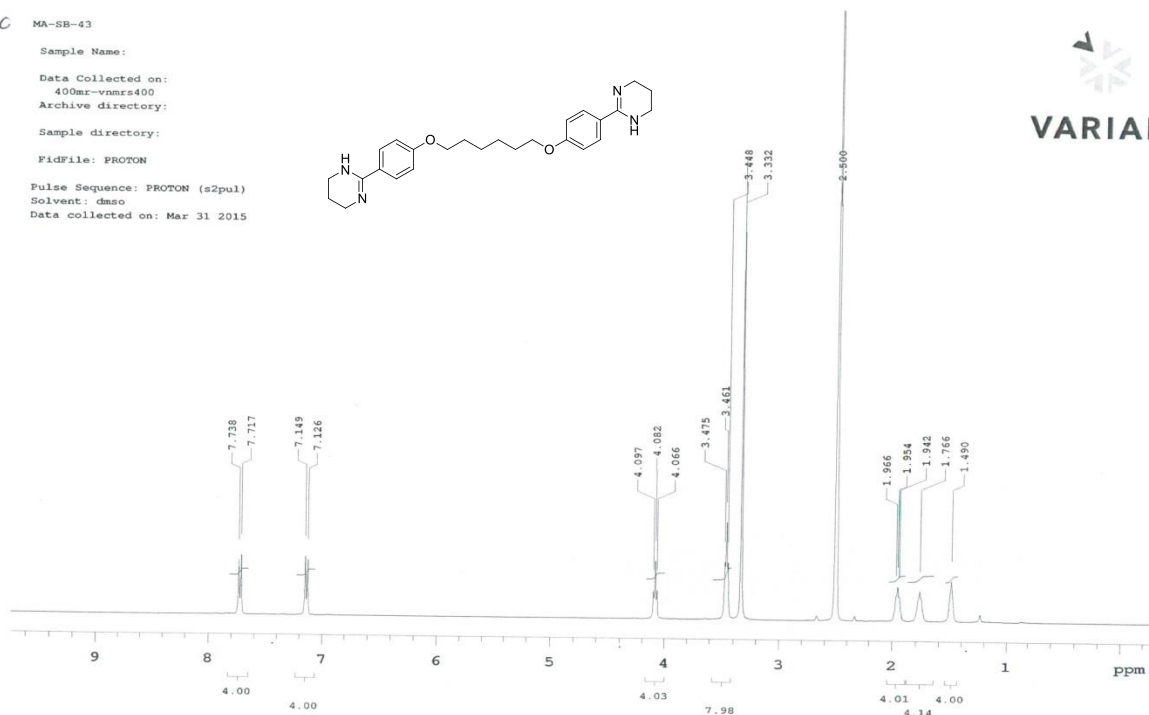

RR\_1005A-C13

Sample Name: 43

Data Collected on:

400mr-vnmrs400

Archive directory:

Sample directory:

FidFile: CARBON

Pulse Sequence: CARBON (s2pul)

Solvent: DMSO

Data collected on: May 12 2015

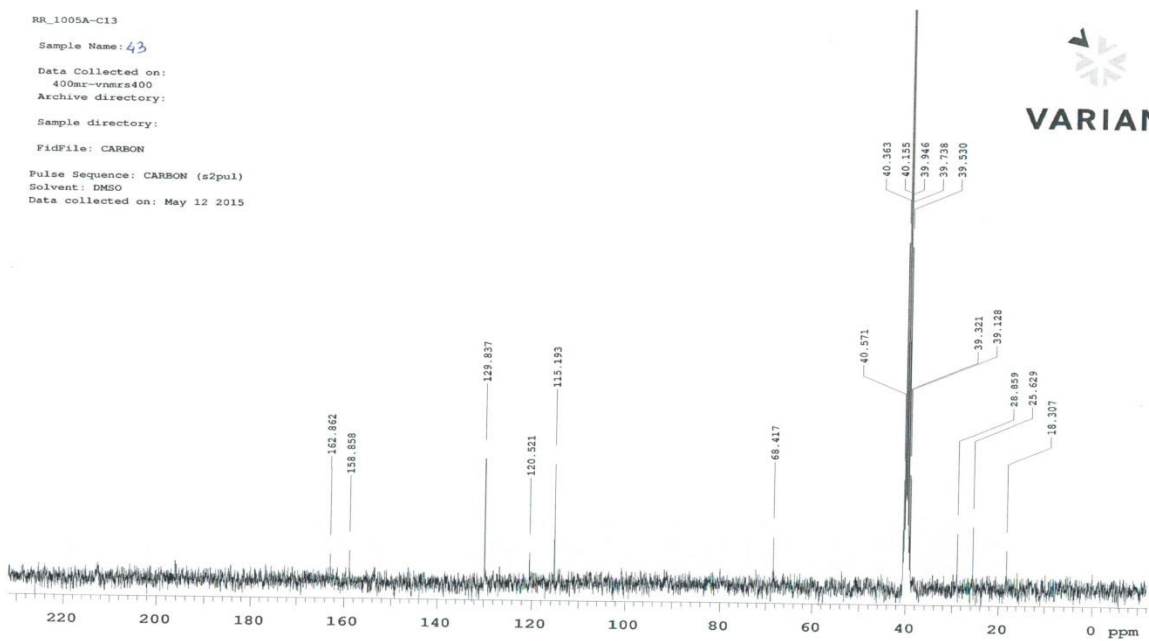

### $^1\text{H}$ and $^{13}\text{C}$ NMR of 6c

MA-SB-42  
 Sample Name:  
 Data Collected on:  
 400mr-vnmr400  
 Archive directory:  
 Sample directory:  
 FidFile: PROTON  
 Pulse Sequence: PROTON (s2pul)  
 Solvent: dms  
 Data collected on: Mar 23 2015

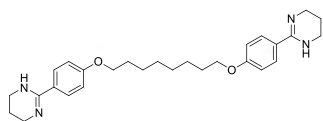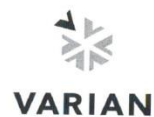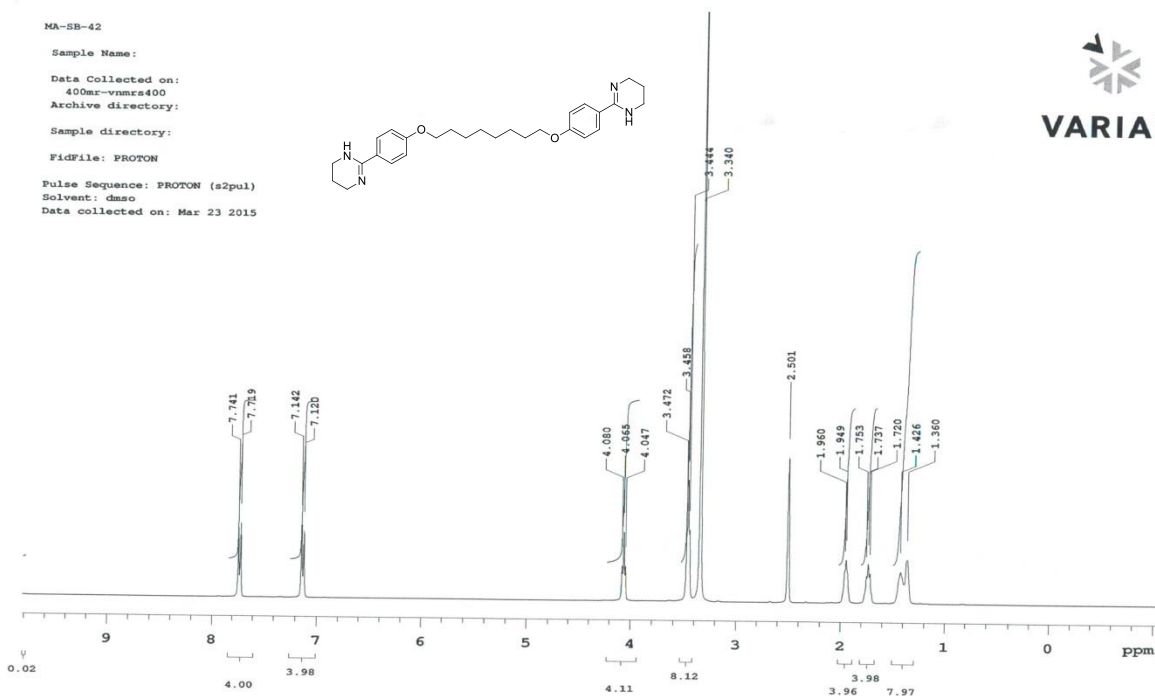

MA-42-C-13-MAY-11  
 Sample Name:  
 Data Collected on:  
 400mr-vnmr400  
 Archive directory:  
 Sample directory:  
 FidFile: CARBON  
 Pulse Sequence: CARBON (s2pul)  
 Solvent: DMSO  
 Data collected on: May 11 2015

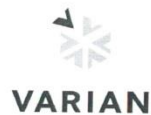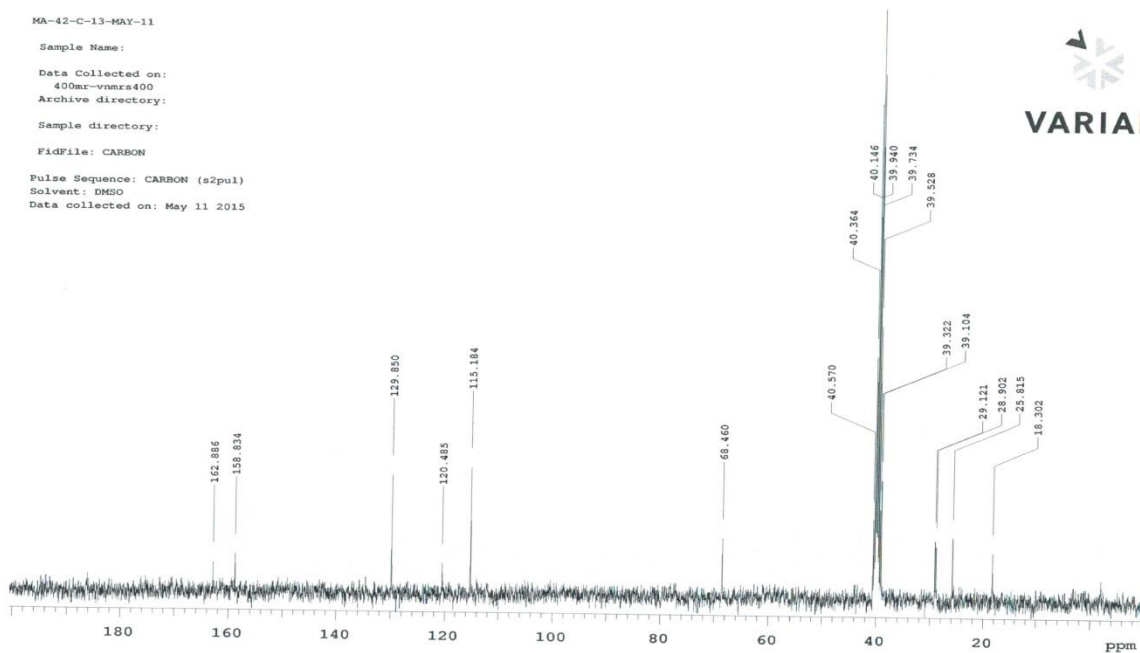

**<sup>1</sup>H and <sup>13</sup>C NMR of 6d**

MA-SB-51

Sample Name: 7a

Data Collected on:  
400mr-vnmr400

Archive directory:

Sample directory:

FidFile: PROTON

Pulse Sequence: PROTON (s2pul)  
Solvent: dms  
Data collected on: Mar 25 2015

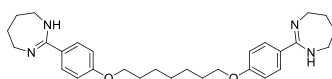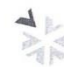

VARIAN

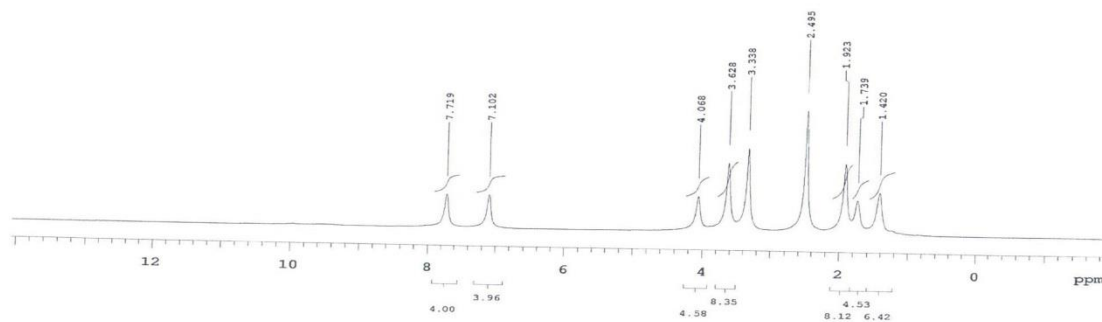

MA-51-C13

Sample Name:

Data Collected on:  
400mr-vnmr400

Archive directory:

Sample directory:

FidFile: CARBON

Pulse Sequence: CARBON (s2pul)  
Solvent: DMSO  
Data collected on: May 12 2015

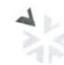

VARIAN

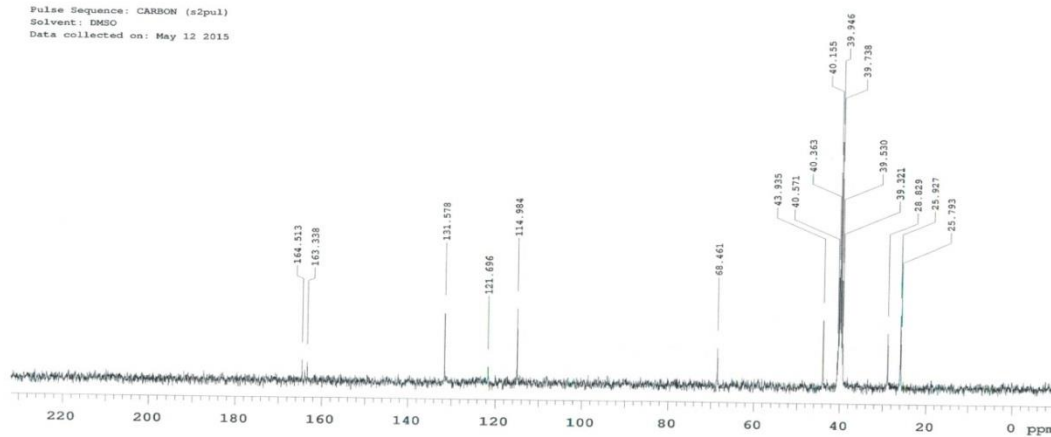

### <sup>1</sup>H and <sup>13</sup>C NMR of 7a



MA-SB-47

Sample Name:

Data Collected on:

400mr-vnmrs400

Archive directory:

Sample directory:

FidFile: MA-SB-47

Pulse Sequence: PROTON (s2pul)

Solvent: dmsc

Data collected on: Mar 25 2015

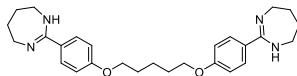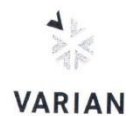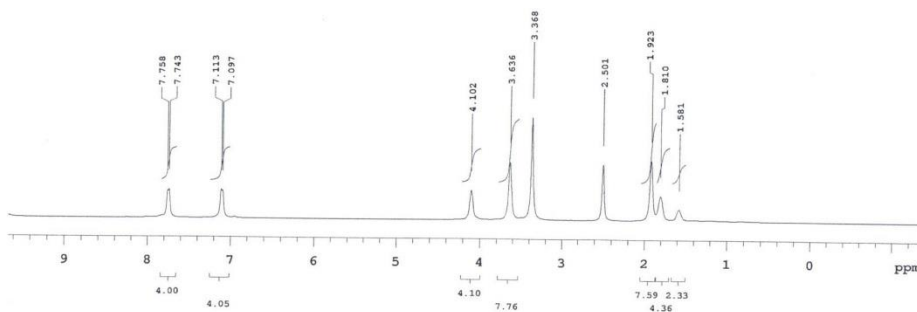

MA-47-C-13-MAY-11

Sample Name:

Data Collected on:

400mr-vnmrs400

Archive directory:

Sample directory:

FidFile: CARBON

Pulse Sequence: CARBON (s2pul)

Solvent: DMSO

Data collected on: May 11 2015

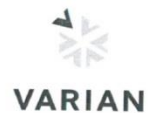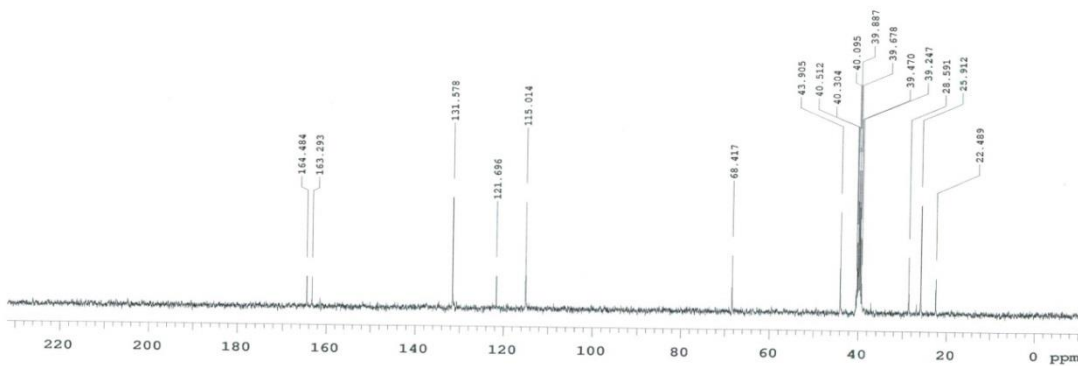

### $^1\text{H}$ and $^{13}\text{C}$ NMR of 7b

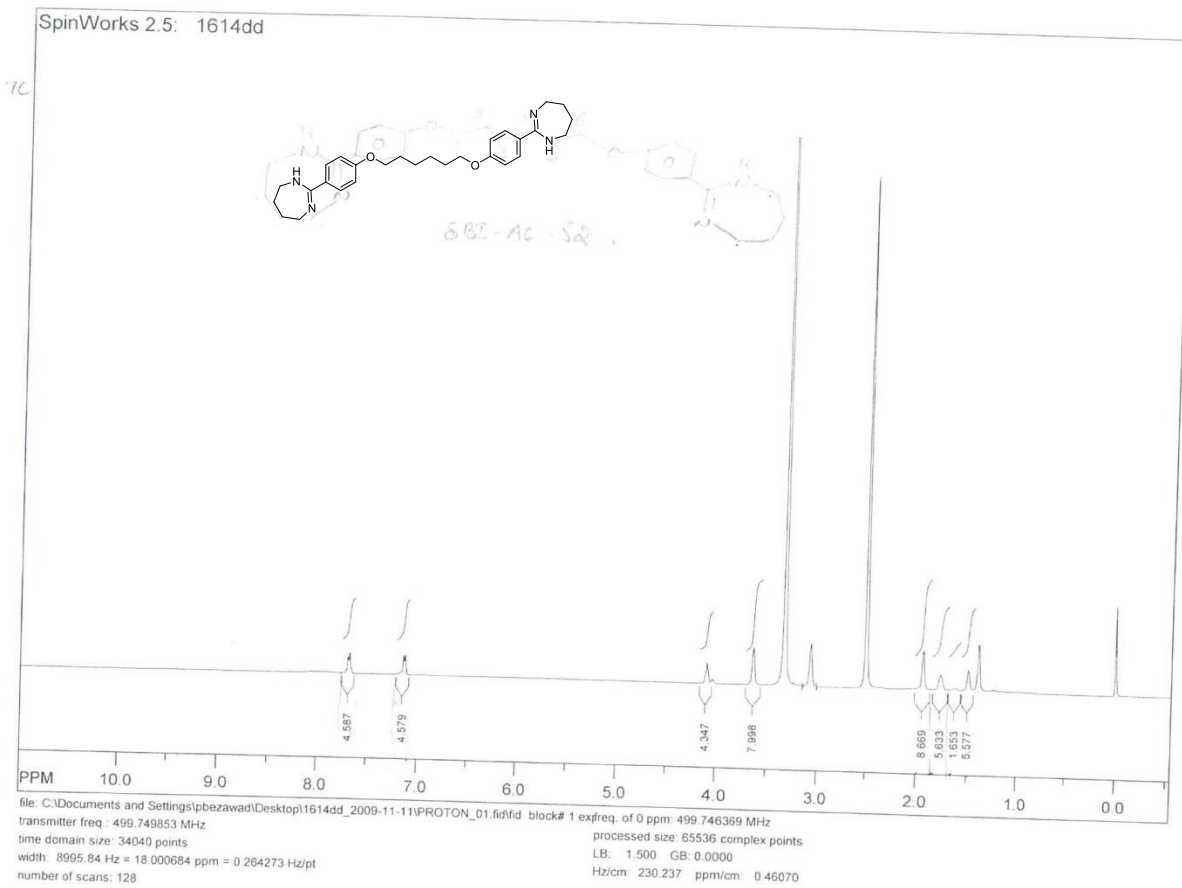

### <sup>1</sup>H NMR of 7c

35

MA-SB-46

Sample Name: 7d

Data Collected on:

400mr-vnmrs400

Archive directory:

Sample directory:

FidFile: PROTON

Pulse Sequence: PROTON (s2pul)

Solvent: dms

Data collected on: Mar 23 2015

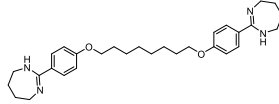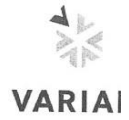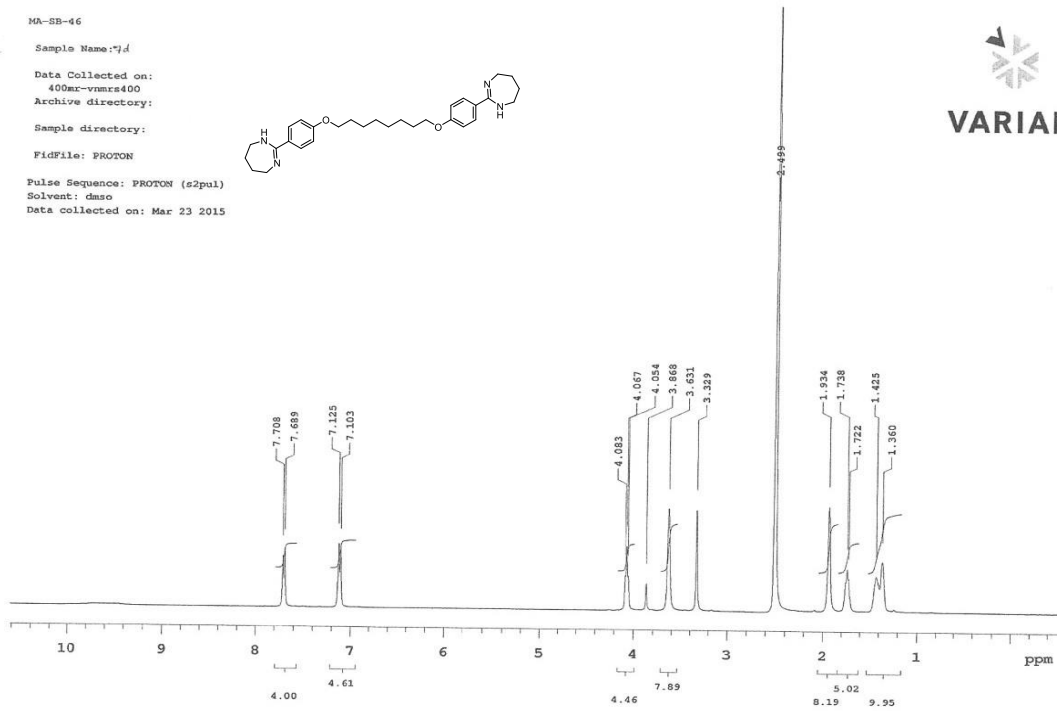

MA-46-C13-R

Sample Name:

Data Collected on:

400mr-vnmrs400

Archive directory:

Sample directory:

FidFile: CARBON

Pulse Sequence: CARBON (s2pul)

Solvent: DMSO

Data collected on: May 12 2015

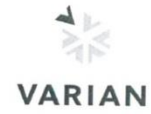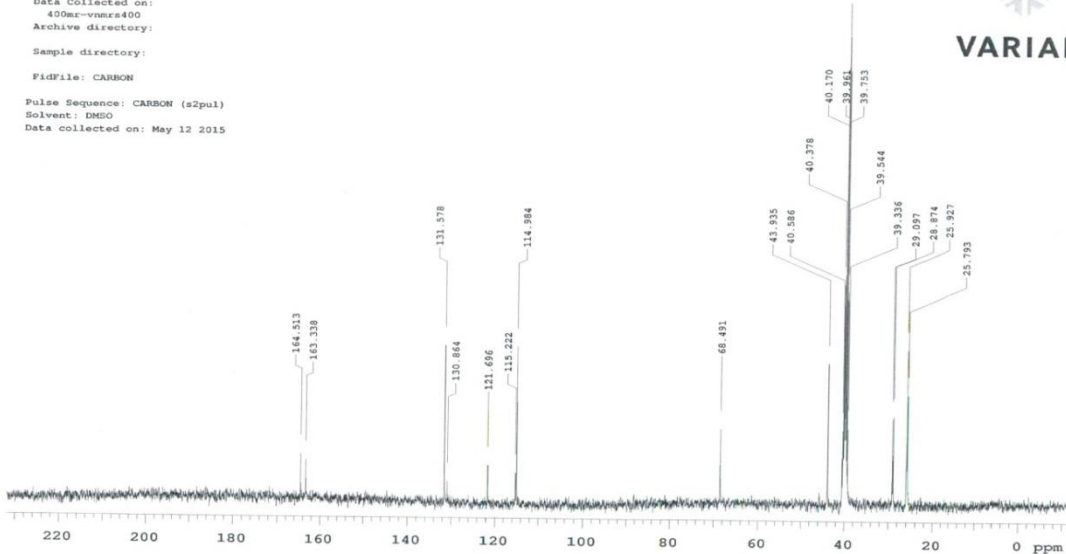

### $^1\text{H}$ and $^{13}\text{C}$ NMR of 7d

MA-60

Sample Name:

Data Collected on:  
400mr-vmrs400

Archive directory:

Sample directory:

FidFile: MA-60

Pulse Sequence: PROTON (s2pul)  
Solvent: dms0  
Data collected on: May 14 2015

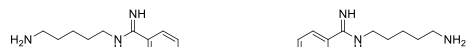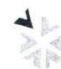

VARIAN

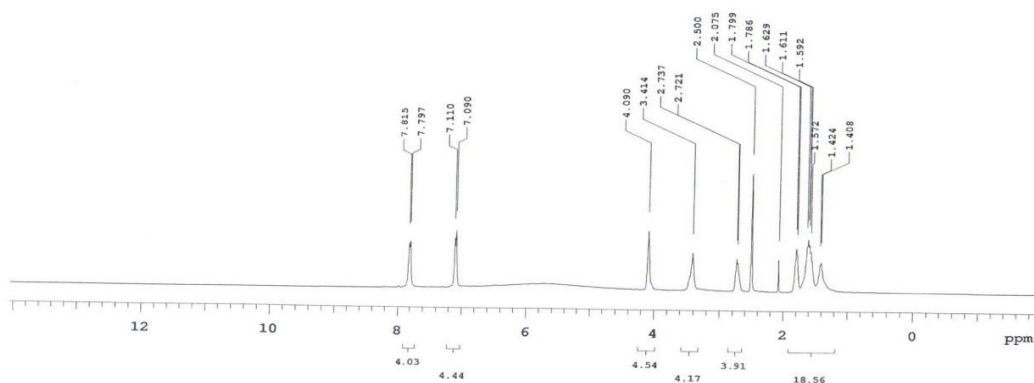

MA-60-C13

Sample Name:

Data Collected on:  
400mr-vmrs400

Archive directory:

Sample directory:

FidFile: CARBON

Pulse Sequence: CARBON (s2pul)  
Solvent: DMSO  
Data collected on: May 14 2015

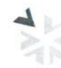

VARIAN

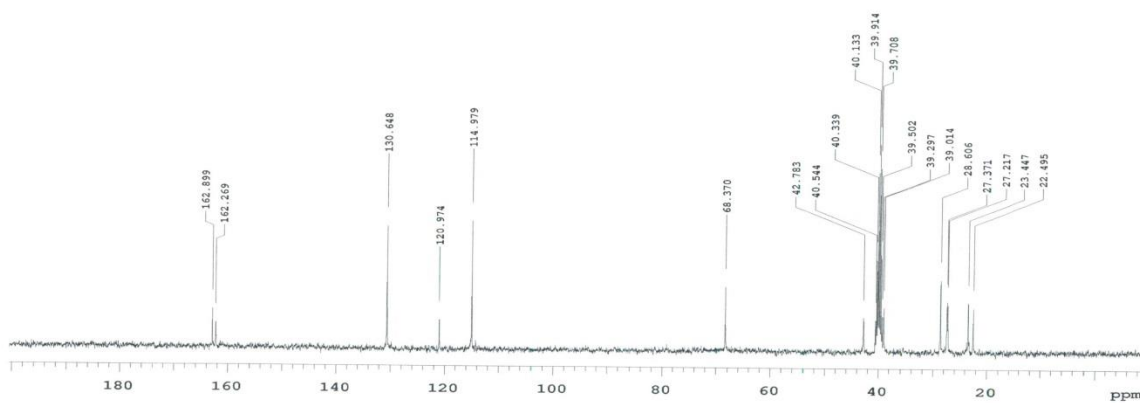

## <sup>1</sup>H and <sup>13</sup>C NMR of 8

MA-56

Sample Name:

Data Collected on:

400mr-vnmr400

Archive directory:

Sample directory:

FidFile: PROTON

Pulse Sequence: PROTON (s2pul)

Solvent: dms

Data collected on: May 14 2015

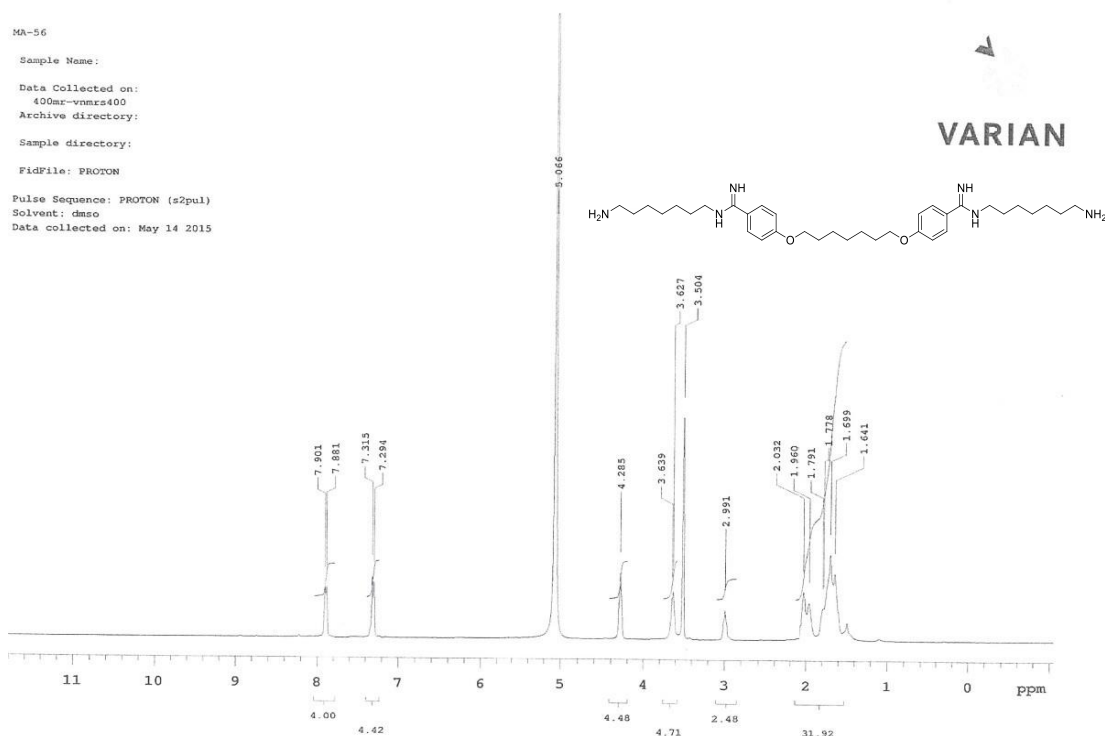

MA-57-C-13-MAY-11

Sample Name:

Data Collected on:

400mr-vnmr400

Archive directory:

Sample directory:

FidFile: CARBON

Pulse Sequence: CARBON (s2pul)

Solvent: DMSO

Data collected on: May 11 2015

Temp. 25.0 C / 298.1 K

Operator: work

Relax. delay 1.000 sec

Pulse 58.1 degrees

Acq. time 0.813 sec

Width 24509.8 Hz

512 repetitions

OBSERVE C13, 100.5180203 MHz

DECOUPLE H1, 399.7551914 MHz

Power 39 dB

continuously on

WALTZ-16 modulated

DATA PROCESSING

Line broadening 3.0 Hz

FT size 32768

Total time 15 min

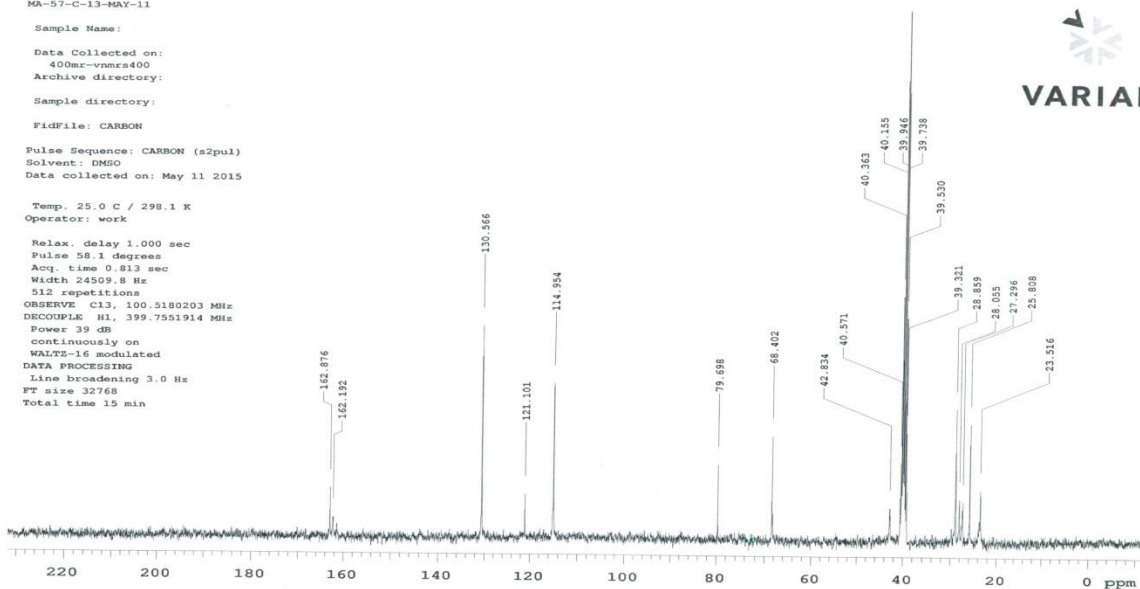

### $^1\text{H}$ and $^{13}\text{C}$ NMR of 9a

MA-SB-54-R

Sample Name:

Data Collected on:

400mr-vnmrs400

Archive directory:

Sample directory:

FidFile: MA-SB-54-R

Pulse Sequence: PROTON (s2pul)

Solvent: dmsc

Data collected on: Mar 31 2015

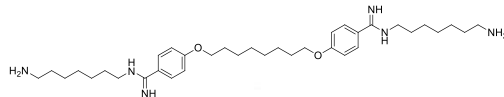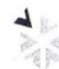

VARIAN

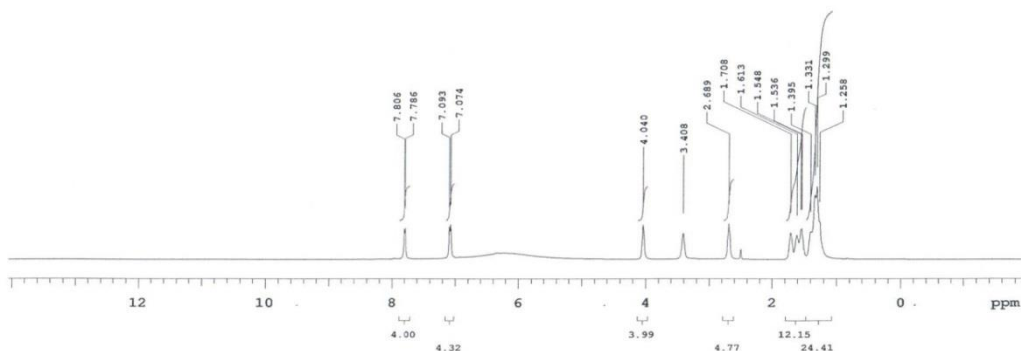

MA-54-C-13-MAY-11

Sample Name:

Data Collected on:

400mr-vnmrs400

Archive directory:

Sample directory:

FidFile: CARBON

Pulse Sequence: CARBON (s2pul)

Solvent: DMSO

Data collected on: May 11 2015

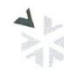

VARIAN

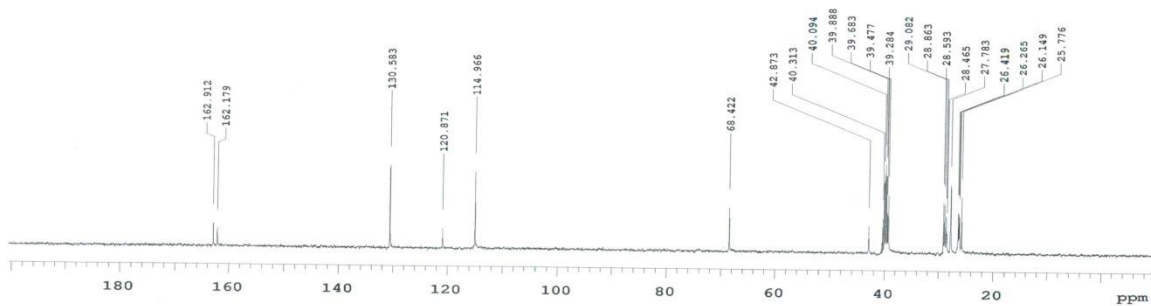

### <sup>1</sup>H and <sup>13</sup>C NMR of 9b

MA-SB-59

Sample Name:

Data Collected on:

400mr-vnmr400

Archive directory:

Sample directory:

FidFile: MA-SB-59

Pulse Sequence: PROTON (s2pul)

Solvent: dmsd

Data collected on: Mar 23 2015

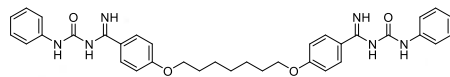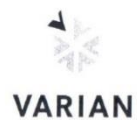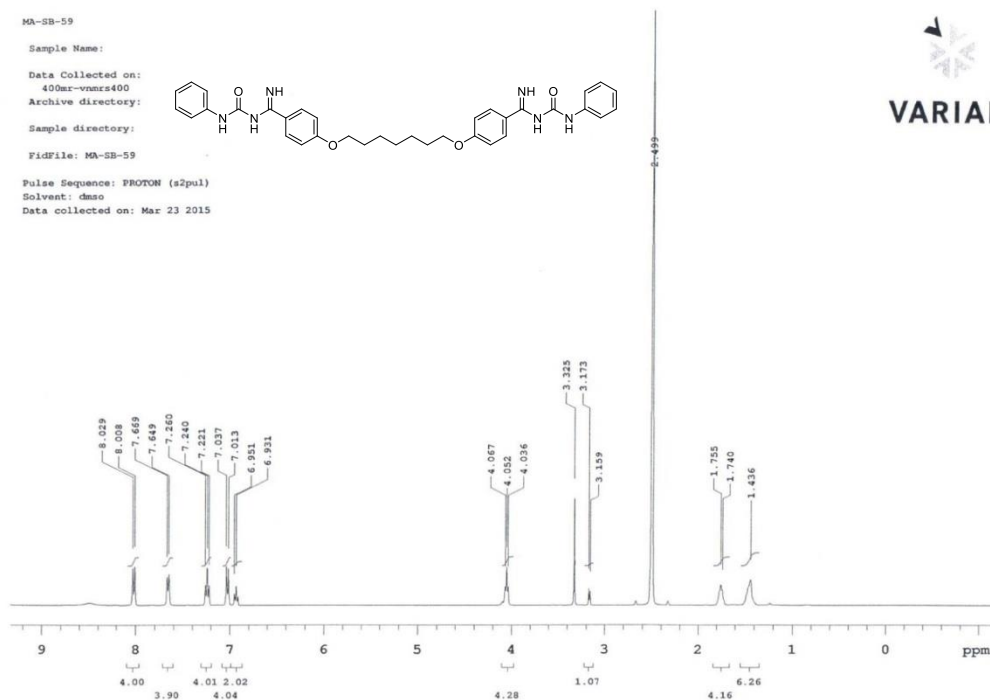

MA-59-C13-R

Sample Name:

Data Collected on:

400mr-vnmr400

Archive directory:

Sample directory:

FidFile: CARBON

Pulse Sequence: CARBON (s2pul)

Solvent: DMSO

Data collected on: May 12 2015

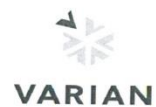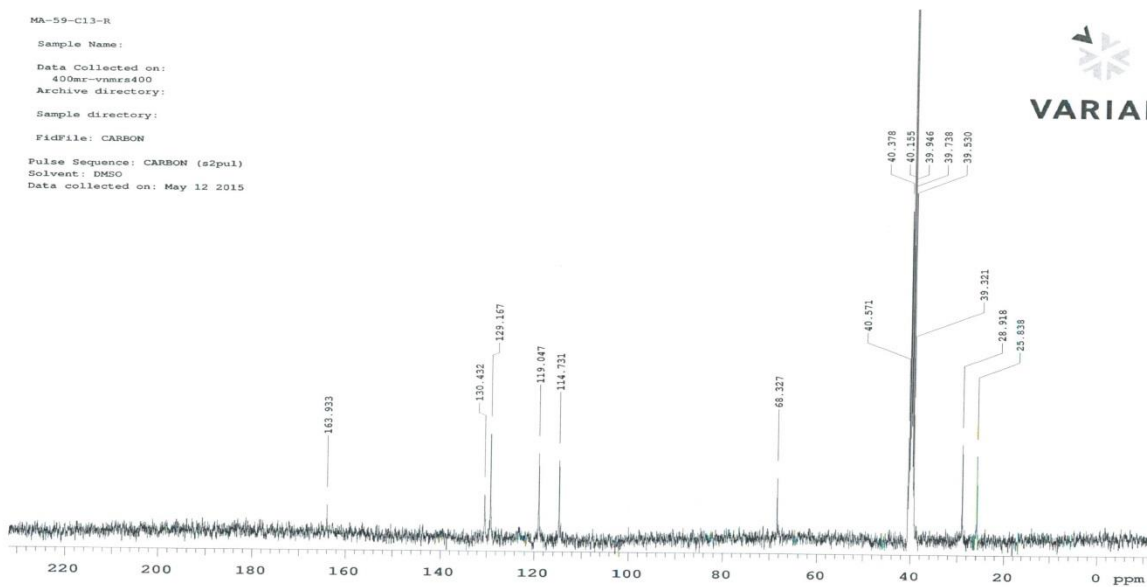

### <sup>1</sup>H and <sup>13</sup>C NMR of 10

MA-SB-37-R

Sample Name:

Data Collected on:

400mr-vnmrs400

Archive directory:

Sample directory:

FidFile: PROTON

Pulse Sequence: PROTON (s2pu1)

Solvent: dmsc

Data collected on: Mar 31 2015

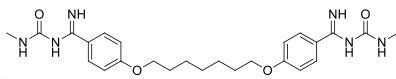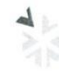

VARIAN

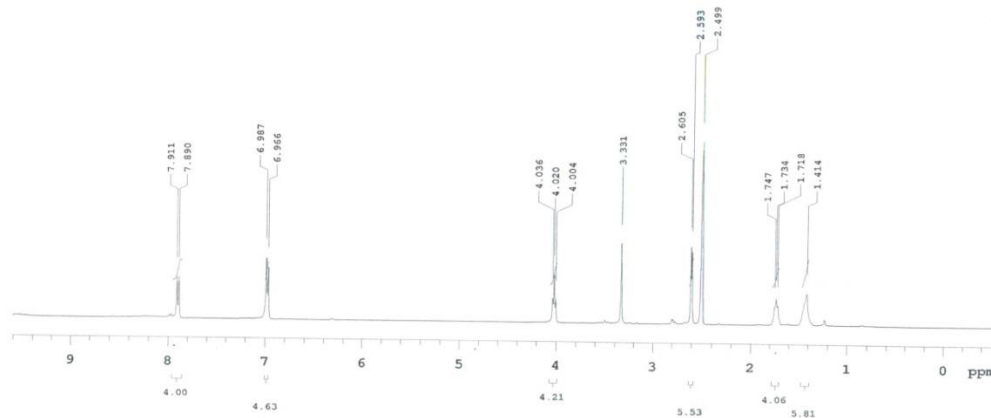

MA-37-C13

Sample Name:

Data Collected on:

400mr-vnmrs400

Archive directory:

Sample directory:

FidFile: CARBON

Pulse Sequence: CARBON (s2pu1)

Solvent: DMSO

Data collected on: May 12 2015

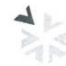

VARIAN

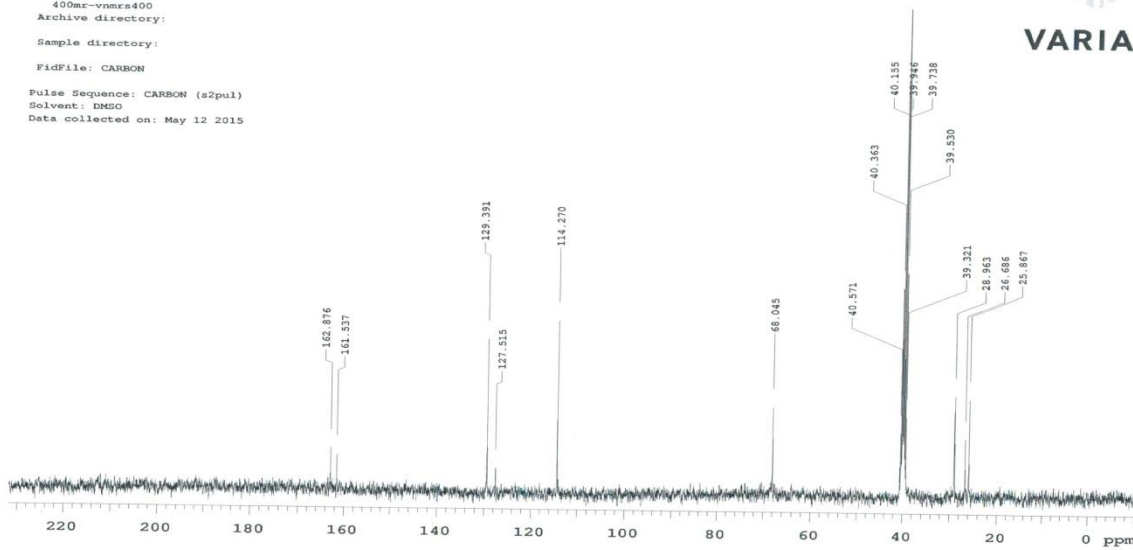

### <sup>1</sup>H and <sup>13</sup>C NMR of 11



MA-SB-63

Sample Name:

Data Collected on:  
400mr-vnmrs400

Archive directory:

Sample directory:

FidFile: PROTON

Pulse Sequence: PROTON (s2pul)  
Solvent: dmsd  
Data collected on: Mar 25 2015

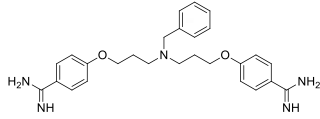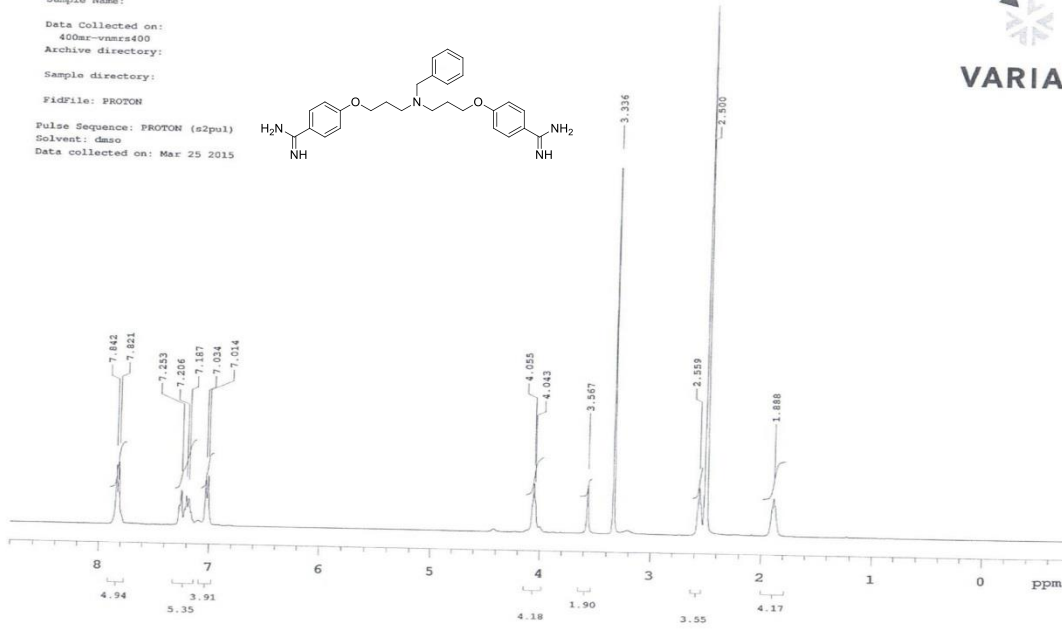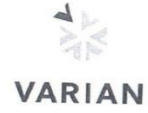

MA-63-C13-R

Sample Name:

Data Collected on:  
400mr-vnmrs400

Archive directory:

Sample directory:

FidFile: CARBON

Pulse Sequence: CARBON (s2pul)  
Solvent: DMSO  
Data collected on: May 12 2015

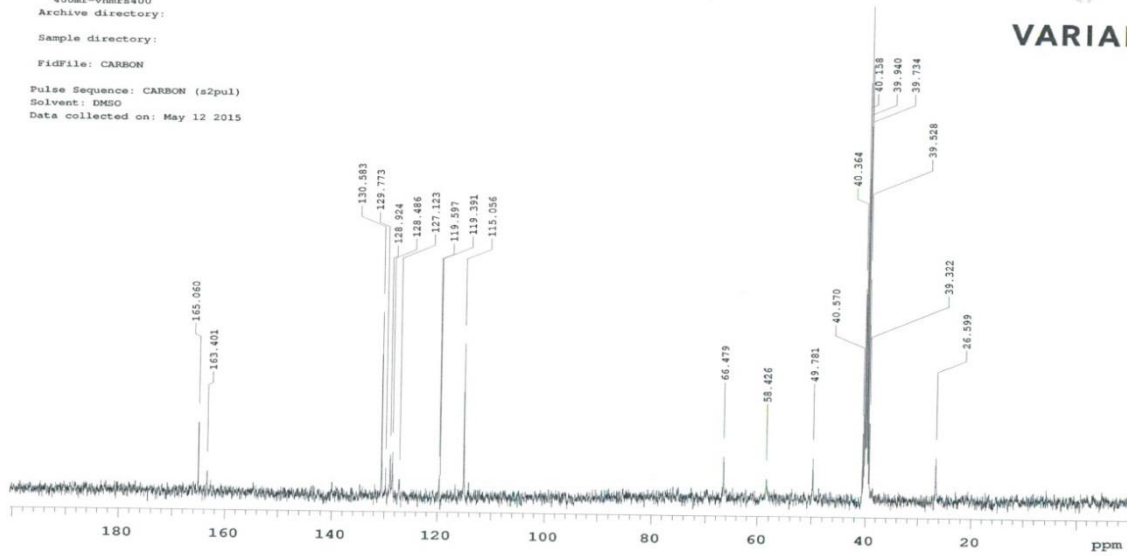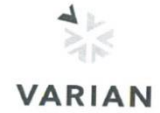

### <sup>1</sup>H and <sup>13</sup>C NMR of 16a

MA-SB-62

Sample Name:

Data Collected on:

400mr-vnmrs400

Archive directory:

Sample directory:

FidFile: MA-SB-62

Pulse Sequence: PROTON (s2pul)

Solvent: dmsd

Data collected on: Mar 25 2015

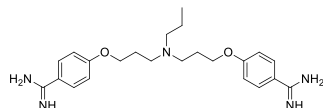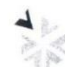

VARIAN

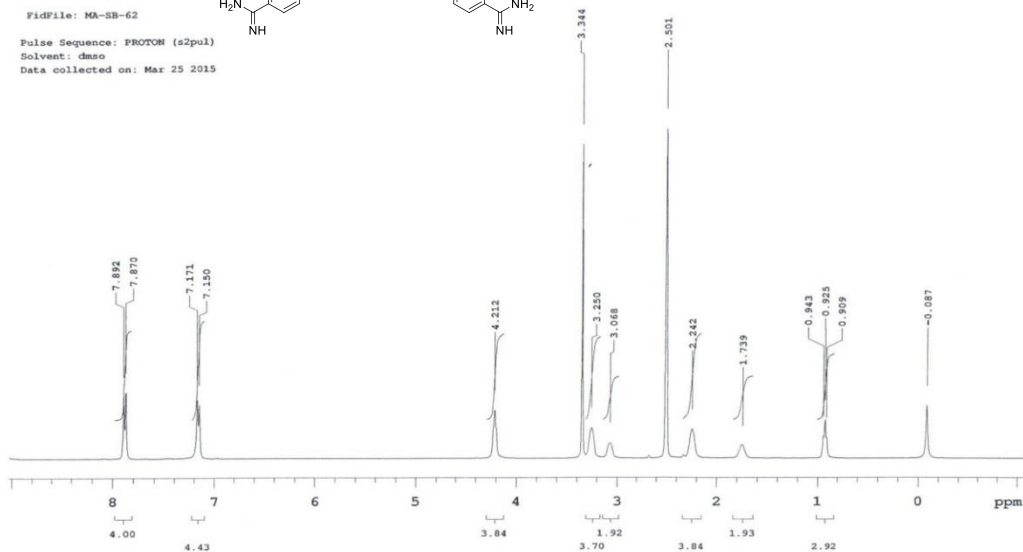

MA-62-C13

Sample Name:

Data Collected on:

400mr-vnmrs400

Archive directory:

Sample directory:

FidFile: CARBON

Pulse Sequence: CARBON (s2pul)

Solvent: DMSO

Data collected on: May 12 2015

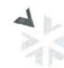

VARIAN

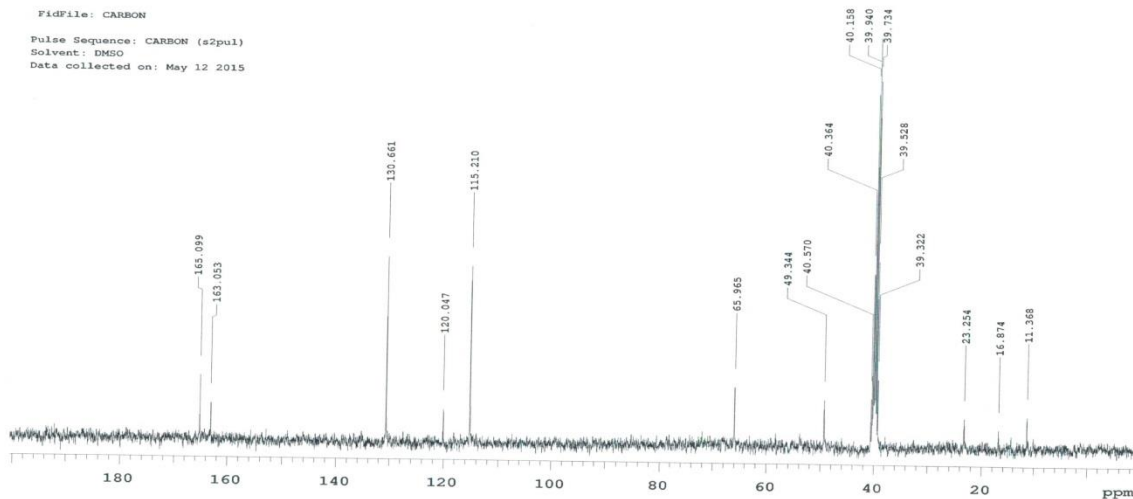

### $^1\text{H}$ and $^{13}\text{C}$ NMR of 16b

**Table S2. SMILES Documentation**

| Prep.<br>I.D. | Internal<br>I.D.<br>SBiX | SMILE                                                                                          |
|---------------|--------------------------|------------------------------------------------------------------------------------------------|
| 4a            | 4211                     | <chem>N=C(N)C(C=C1)=CC=C1OCCCCCCCOC2=CC=C(C(N)=N)C=C2</chem>                                   |
| 4b            | 1                        | <chem>N=C(C1=CC=C(OCCCCCOC2=CC=C(C(N)=N)C=C2)C=C1)N</chem>                                     |
| 4c            | 4210                     | <chem>N=C(N)C(C=C1)=CC=C1OCCCCCCCOC2=CC=C(C(N)=N)C=C2</chem>                                   |
| 5a            | 4225                     | <chem>C1(C2=NCCN2)=CC=C(OCCCCCCCOC3=CC=C(C4=NCCN4)C=C3)C=C1</chem>                             |
| 5b            | 4224                     | <chem>C1(C2=NCCN2)=CC=C(OCCCCCOC3=CC=C(C4=NCCN4)C=C3)C=C1</chem>                               |
| 5c            | 4226                     | <chem>C1(C2=CC=C(OCCCCCOC3=CC=C(C4=NCCN4)C=C3)C=C2)=NCCN1</chem>                               |
| 5d            | 4221                     | <chem>C1(C2=CC=C(OCCCCCCCOC3=CC=C(C4=NCCN4)C=C3)C=C2)=NCCN1</chem>                             |
| 6a            | 4213                     | <chem>C1(C2=NCCCN2)=CC=C(OCCCCCCCOC3=CC=C(C4=NCCCN4)C=C3)C=C1</chem>                           |
| 6b            | 4214                     | <chem>C1(C2=NCCCN2)=CC=C(OCCCCCOC3=CC=C(C4=NCCCN4)C=C3)C=C1</chem>                             |
| 6c            | 4218                     | <chem>C1(C2=NCCCN2)=CC=C(OCCCCCOC3=CC=C(C4=NCCCN4)C=C3)C=C1</chem>                             |
| 6d            | 4217                     | <chem>C1(C2=NCCCN2)=CC=C(OCCCCCCCOC3=CC=C(C4=NCCCN4)C=C3)C=C1</chem>                           |
| 7a            | 4227                     | <chem>C1(C2=CC=C(OCCCCCCCOC3=CC=C(C4=NCCCN4)C=C3)C=C2)=NCCCN1</chem>                           |
| 7b            | 4223                     | <chem>C1(C2=CC=C(OCCCCCOC3=CC=C(C4=NCCCN4)C=C3)C=C2)=NCCCN1</chem>                             |
| 7c            | 4228                     | <chem>C1(C2=CC=C(OCCCCCOC3=CC=C(C4=NCCCN4)C=C3)C=C2)=NCCCN1</chem>                             |
| 7d            | 4222                     | <chem>C1(C2=CC=C(OCCCCCCCOC3=CC=C(C4=NCCCN4)C=C3)C=C2)=NCCCN1</chem>                           |
| 8             | 4236                     | <chem>N=C(NCCCCCN)C(C=C1)=CC=C1OCCCCCOC2=CC=C(C(NCCCCCN)=N)C=C2</chem>                         |
| 9a            | 4232                     | <chem>N=C(NCCCCCCCN)C(C=C1)=CC=C1OCCCCCCCOC2=CC=C(C(NCCCCCCCN)=N)C=C2</chem>                   |
| 9b            | 4230                     | <chem>N=C(NCCCCCCCN)C1=CC=C(OCCCCCCCOC2=CC=C(C(NCCCCCCCN)=N)C=C2)C=C1</chem>                   |
| 10            | 4235                     | <chem>N=C(NC(NC1=CC=CC=C1)=O)C(C=C2)=CC=C2OCCCCCCCOC3=CC=C(C(NC(NC4=CC=CC=C4)=O)=N)C=C3</chem> |
| 11            | 4212                     | <chem>CNC(NC(C1=CC=C(OCCCCCCCOC2=CC=C(C(NC(NC)=O)=N)C=C2)C=C1)=N)=O</chem>                     |
| 16a           | 4239                     | <chem>NC(C(C=C1)=CC=C1OCCCN(CCC2=CC=CC=C2)CCCOC3=CC=C(C(N)=N)C=C3)=N</chem>                    |
| 16b           | 4238                     | <chem>NC(C(C=C1)=CC=C1OCCCN(CCC)CCCOC2=CC=C(C(N)=N)C=C2)=N</chem>                              |
| 17            | 29                       | <chem>N=C(C1=CC=C(OCC2=CC=C(C3=CC(C=CC(C(N)=N)=C4)=C4N3)C=C2)C=C1)N</chem>                     |
